# Supplementary material for: Dynamic transcriptome and DNA methylome analyses on longissimus dorsi to identify genes underlying intramuscular fat content in pigs
Source: BMC Genomics. 2017 Oct 12;18:780. doi: 10.1186/s12864-017-4201-9 (PMC5639760; doi:10.1186/s12864-017-4201-9)
Supplement: Supplementary file 4 — The differentially expressed genes (DEGs) in 60 d vs 120 d, 120 d vs 240 d and 240 d vs 400d. We showed all DEGs only with absolute value of log2 (Fold-Change) ≥ 1 and FDR ≤ 0.01 in adjacent development stages of Laiwu pigs. (XLSX 81 kb) [file 12864_2017_4201_MOESM4_ESM.xlsx]

## Sheet: 60d vs 120d
Ensemble gene ID	FPKM(60d)	FPKM(120d)	FDR	log2(fold change)
pig_newGene_807	17.7945	5.92263	0.00121685	-1.58712
ENSSSCG00000016853	1.50613	3.35694	0.00541722	1.15631
ENSSSCG00000008898	2.15735	5.99001	0.00308287	1.4733
ENSSSCG00000010201	0.142828	1.33314	0.00121685	3.22248
ENSSSCG00000006290	1.95965	5.60626	0.00121685	1.51644
ENSSSCG00000012371	1.52991	0.637738	0.00121685	-1.26241
pig_newGene_52	5.068	1.13599	0.00121685	-2.15747
ENSSSCG00000023298	2.39703	7.29177	0.00121685	1.60502
pig_newGene_1438	4.85654	11.9289	0.00679118	1.29646
ENSSSCG00000011538	101.396	237.968	0.00121685	1.23076
ENSSSCG00000021283	1.21086	0.361749	0.00221278	-1.74297
ENSSSCG00000016646	40.9296	101.42	0.00121685	1.30912
ENSSSCG00000001906	1.76484	0.144758	0.00121685	-3.60783
ENSSSCG00000005631	0.48233	1.90004	0.00121685	1.97794
ENSSSCG00000007463	3.08201	6.86452	0.00121685	1.15529
ENSSSCG00000029507	2.71166	10.7788	0.00121685	1.99095
ENSSSCG00000012653	5.76875	11.6744	0.00742881	1.01702
ENSSSCG00000015617	11.9367	5.15982	0.00986568	-1.21001
ENSSSCG00000015850	0.609458	4.66719	0.00121685	2.93695
ENSSSCG00000013599	5.75913	12.1658	0.00121685	1.07891
ENSSSCG00000008294	1.2773	5.28062	0.00121685	2.0476
ENSSSCG00000027130	53.3638	175.406	0.00121685	1.71676
ENSSSCG00000004399	30.4266	13.3426	0.00121685	-1.18929
ENSSSCG00000002366	11.9542	28.3971	0.00121685	1.24822
ENSSSCG00000013303	0.378597	1.38612	0.00121685	1.87231
ENSSSCG00000014362	14.418	39.7267	0.00121685	1.46224
pig_newGene_2119	8.1112	1.57272	0.00541722	-2.36665
ENSSSCG00000017581	193.72	414.035	0.00742881	1.09578
ENSSSCG00000029557	2.61036	6.38986	0.00121685	1.29154
ENSSSCG00000012915	0.590899	2.18019	0.00742881	1.88347
ENSSSCG00000009620	4.43787	9.77388	0.00679118	1.13906
ENSSSCG00000022368	5.95805	1.84082	0.00121685	-1.69449
ENSSSCG00000004803	5.25276	37.6858	0.00121685	2.84287
ENSSSCG00000009097	21.3496	44.421	0.00467898	1.05703
ENSSSCG00000012160	1.69066	4.83944	0.00121685	1.51726
ENSSSCG00000009338	2.6303	7.4983	0.00221278	1.51134
ENSSSCG00000004520	2.03948	0.698523	0.00121685	-1.54582
ENSSSCG00000003766	38.1888	84.0865	0.00121685	1.13872
ENSSSCG00000028552	10.0323	3.70549	0.00121685	-1.43691
ENSSSCG00000024888	4.12224	9.02627	0.00121685	1.1307
ENSSSCG00000011574	3.39496	1.12745	0.00679118	-1.59034
ENSSSCG00000011265	67.3083	646.234	0.00121685	3.2632
pig_newGene_91	1.00318	3.47768	0.00121685	1.79355
ENSSSCG00000012548	4.36685	1.66651	0.00221278	-1.38976
ENSSSCG00000006919	1.70193	0.549362	0.00541722	-1.63135
ENSSSCG00000026474	0.294654	1.39759	0.00308287	2.24585
ENSSSCG00000001076	12.0091	5.44133	0.00121685	-1.14209
ENSSSCG00000029990	16.6134	2.14588	0.00121685	-2.95271
ENSSSCG00000024982	2.78756	5.91435	0.00467898	1.08522
ENSSSCG00000011451	0.57881	1.71995	0.00926216	1.5712
ENSSSCG00000005604	3.15524	1.11429	0.00121685	-1.50163
ENSSSCG00000015435	54.7704	116.032	0.00390909	1.08306
ENSSSCG00000016047	5.83706	2.05205	0.00221278	-1.50817
pig_newGene_3270	13.7218	6.3013	0.00390909	-1.12275
ENSSSCG00000030395	94.5035	256.07	0.00121685	1.4381
pig_newGene_2761	3.63269	12.3554	0.00121685	1.76603
ENSSSCG00000005750	0.740626	2.44803	0.00390909	1.7248
pig_newGene_3036	1.67798	4.98107	0.00121685	1.56973
ENSSSCG00000005589	0.393518	1.39135	0.00121685	1.82198
ENSSSCG00000022953	18.8607	9.1535	0.00221278	-1.04299
ENSSSCG00000011775	14.4523	29.768	0.00467898	1.04246
ENSSSCG00000017579	28.4311	77.1583	0.00121685	1.44035
ENSSSCG00000028941	0	1.33653	0.00121685	inf
ENSSSCG00000028492	4.56213	10.5523	0.00121685	1.20978
ENSSSCG00000015595	26.2568	138.819	0.00121685	2.40244
ENSSSCG00000022913	59.8095	26.3621	0.00221278	-1.18191
ENSSSCG00000004347	18.0118	8.7891	0.00121685	-1.03516
ENSSSCG00000017987	1.75547	5.789	0.00121685	1.72146
ENSSSCG00000011980	13.1227	26.9281	0.00121685	1.03705
ENSSSCG00000027341	1.33507	5.09133	0.00121685	1.93112
pig_newGene_2525	0.276367	1.22209	0.00742881	2.1447
pig_newGene_3419	0	4.1139	0.00742881	inf
ENSSSCG00000011669	4.56035	10.1533	0.00121685	1.15473
ENSSSCG00000009462	4.52837	17.4742	0.00121685	1.94816
ENSSSCG00000014157	1.56335	4.33234	0.00121685	1.47051
ENSSSCG00000010035	19.2337	42.3982	0.00121685	1.14036
ENSSSCG00000026023	1.26844	8.50196	0.00121685	2.74474
ENSSSCG00000013397	1.79551	7.22017	0.00121685	2.00764
ENSSSCG00000028828	4.49018	9.74594	0.00121685	1.11803
pig_newGene_3940	50.6848	17.5867	0.00308287	-1.52707
ENSSSCG00000001422	1.16	2.7562	0.00806905	1.24855
ENSSSCG00000003079	1.05233	4.19538	0.00121685	1.99521
ENSSSCG00000004094	58.0775	16.7679	0.00121685	-1.79228
ENSSSCG00000010522	148.587	348.904	0.00121685	1.23153
ENSSSCG00000007401	5.02269	16.3914	0.00121685	1.7064
ENSSSCG00000004012	1.67706	4.11071	0.00121685	1.29346
pig_newGene_1486	2.34781	10.5179	0.00121685	2.16346
ENSSSCG00000001573	2.48575	6.34004	0.00121685	1.35081
ENSSSCG00000012631	2.67938	9.94013	0.00121685	1.89137
ENSSSCG00000016690	2.86075	8.86194	0.00390909	1.63123
ENSSSCG00000011264	3.72251	9.45602	0.00121685	1.34496
pig_newGene_1191	0.154132	1.3539	0.00221278	3.13488
ENSSSCG00000026819	11.3121	24.6121	0.00221278	1.1215
pig_newGene_3578	4.17864	13.7772	0.00121685	1.72118
pig_newGene_2117	0	1.45453	0.00121685	inf
ENSSSCG00000009592	1.2214	7.09008	0.00121685	2.53727
ENSSSCG00000010150	5.62552	13.6134	0.00121685	1.27497
ENSSSCG00000017753	7.30178	15.614	0.00221278	1.09652
ENSSSCG00000009432	4.61014	11.9827	0.00121685	1.37807
pig_newGene_2088	13.3756	1.55484	0.00121685	-3.10476
ENSSSCG00000029886	1.05332	3.58288	0.00121685	1.76617
ENSSSCG00000014357	37.1158	17.4087	0.00221278	-1.09223
ENSSSCG00000016302	7.06776	16.1971	0.00121685	1.19641
pig_newGene_648	38.5553	17.7811	0.00121685	-1.11658
ENSSSCG00000027903	29.9006	60.6686	0.00986568	1.02077
ENSSSCG00000010219	1.48245	5.82704	0.00121685	1.97478
ENSSSCG00000024812	3.18393	9.30008	0.00121685	1.54643
pig_newGene_14	0.350906	1.73655	0.00390909	2.30707
ENSSSCG00000025858	9.28845	25.5008	0.00121685	1.45703
ENSSSCG00000028983	1.44402	4.37802	0.00611378	1.60018
ENSSSCG00000011106	4.78049	20.1688	0.00121685	2.0769
ENSSSCG00000013579	3.40458	10.3383	0.00221278	1.60246
pig_newGene_4230	3.04799	0.888053	0.00390909	-1.77914
ENSSSCG00000025409	13.3264	82.7419	0.00121685	2.63433
ENSSSCG00000016792	5.4683	54.9191	0.00121685	3.32814
ENSSSCG00000027575	4.36714	1.82629	0.00926216	-1.25777
ENSSSCG00000030165	5.66637	20.3628	0.00121685	1.84544
ENSSSCG00000015334	271.326	722.317	0.00121685	1.41261
ENSSSCG00000006729	4.991	1.26551	0.00121685	-1.97961
ENSSSCG00000004238	6.51728	17.2072	0.00611378	1.40067
ENSSSCG00000008736	0.81545	2.10179	0.00221278	1.36595
ENSSSCG00000021595	60.9688	231.206	0.00121685	1.92304
ENSSSCG00000029275	3.4137	27.7621	0.00121685	3.02371
ENSSSCG00000025712	1.82447	5.09838	0.00679118	1.48256
ENSSSCG00000011727	1.60592	4.72255	0.00121685	1.55617
ENSSSCG00000005385	0.670961	28.6536	0.00121685	5.41634
ENSSSCG00000022247	0.760406	1.9319	0.00390909	1.34518
ENSSSCG00000014221	0.821138	1.83375	0.00986568	1.1591
ENSSSCG00000011831	30.1846	75.7362	0.00121685	1.32717
ENSSSCG00000028327	34.4727	14.7425	0.00121685	-1.22547
pig_newGene_410	0.395734	1.16415	0.00866872	1.55668
ENSSSCG00000012623	5.2423	12.3064	0.00467898	1.23114
ENSSSCG00000016062	1.81029	6.0348	0.00121685	1.73709
ENSSSCG00000007864	22.3722	11.1461	0.00121685	-1.00516
ENSSSCG00000004332	0.458975	1.5226	0.00467898	1.73005
ENSSSCG00000026600	13.4558	29.275	0.00121685	1.12144
ENSSSCG00000010850	9.77462	56.7186	0.00121685	2.53671
ENSSSCG00000013374	1.50629	5.22989	0.00121685	1.79578
ENSSSCG00000009545	27.6593	56.0236	0.00121685	1.01827
ENSSSCG00000000660	0.071482	11.9359	0.00121685	7.38351
pig_newGene_3271	1.10703	6.04271	0.00221278	2.44851
ENSSSCG00000014880	3.14742	1.19952	0.00742881	-1.39172
ENSSSCG00000008629	16.1998	35.5261	0.00121685	1.1329
ENSSSCG00000001835	2.06622	12.7643	0.00121685	2.62705
ENSSSCG00000014834	52.2143	111.826	0.00121685	1.09874
ENSSSCG00000003018	7.81419	16.0668	0.00121685	1.03991
ENSSSCG00000010814	1.39161	3.31952	0.00121685	1.25423
ENSSSCG00000010461	39.8344	806.204	0.00121685	4.33906
ENSSSCG00000000606	42.7698	115.491	0.00121685	1.43312
ENSSSCG00000007477	0.833913	1.91286	0.00390909	1.19776
ENSSSCG00000011195	3.11252	10.7488	0.00121685	1.78802
ENSSSCG00000021015	31.8178	79.9813	0.00121685	1.32983
ENSSSCG00000028322	102.679	43.6296	0.00308287	-1.23476
ENSSSCG00000003147	14.2632	3.91286	0.00121685	-1.866
ENSSSCG00000008509	6.60032	2.52926	0.00121685	-1.38382
ENSSSCG00000023672	9.35622	3.46161	0.00308287	-1.43448
ENSSSCG00000004479	11.1996	27.845	0.00121685	1.31397
ENSSSCG00000002140	41.8722	17.4487	0.00121685	-1.26288
ENSSSCG00000024043	1.1036	2.4372	0.00390909	1.143
ENSSSCG00000004244	1.02102	2.3842	0.00541722	1.22349
pig_newGene_1345	1.31485	0.435783	0.00467898	-1.59322
pig_newGene_2435	4.22987	8.85961	0.00926216	1.06663
ENSSSCG00000016726	3.75706	1.67347	0.00121685	-1.16676
ENSSSCG00000027396	5.38122	20.0553	0.00806905	1.89798
ENSSSCG00000011233	8.129	18.2127	0.00121685	1.16379
ENSSSCG00000016432	4.43416	18.1606	0.00121685	2.03408
ENSSSCG00000004233	2.10575	5.95213	0.00986568	1.49907
ENSSSCG00000021918	6.15916	2.95514	0.00121685	-1.05951
ENSSSCG00000026110	2.02112	6.45244	0.00121685	1.67469
ENSSSCG00000007043	5.13299	13.053	0.00121685	1.34651
ENSSSCG00000029074	81.9711	180.756	0.00121685	1.14085
ENSSSCG00000010044	67.4966	4.08022	0.00121685	-4.0481
ENSSSCG00000030113	31.7942	15.0028	0.00121685	-1.08353
ENSSSCG00000014725	79.863	179.617	0.00121685	1.16933
ENSSSCG00000014189	1.62378	0	0.00121685	#NAME?
ENSSSCG00000011646	28.9286	10.438	0.00121685	-1.47065
pig_newGene_2507	0.124531	2.01372	0.00121685	4.01529
pig_newGene_1615	5.47111	27.9357	0.00121685	2.35221
ENSSSCG00000009134	34.5703	16.7169	0.00121685	-1.04822
ENSSSCG00000030385	2.43412	6.23035	0.00121685	1.35591
ENSSSCG00000024174	3.36174	9.62175	0.00121685	1.51709
ENSSSCG00000006036	79.4277	236.087	0.00121685	1.57161
ENSSSCG00000015683	8.1164	3.12654	0.00121685	-1.37627
ENSSSCG00000004139	0.349956	1.16029	0.00121685	1.72924
ENSSSCG00000001921	8.07599	4.0336	0.00121685	-1.00157
pig_newGene_444	1.38038	9.97753	0.00121685	2.85362
ENSSSCG00000009202	0.305475	1.10596	0.00390909	1.85618
ENSSSCG00000012051	0.637883	5.40686	0.00121685	3.08343
ENSSSCG00000028137	8.12138	20.8392	0.00679118	1.3595
pig_newGene_99	2.83992	11.6581	0.00121685	2.03741
pig_newGene_1606	2.93902	10.7507	0.00121685	1.87103
ENSSSCG00000002281	11.5466	26.2233	0.00121685	1.18338
ENSSSCG00000016530	21.6732	68.4135	0.00121685	1.65837
ENSSSCG00000029944	3.7598	12.4083	0.00121685	1.72258
ENSSSCG00000017251	0.216712	1.51254	0.00121685	2.80313
ENSSSCG00000002383	158.352	61.8685	0.00121685	-1.35586
ENSSSCG00000027559	56.5896	23.3364	0.00121685	-1.27796
ENSSSCG00000028760	4.29461	19.5964	0.00121685	2.18999
ENSSSCG00000003722	0.177736	38.0837	0.00121685	7.74329
pig_newGene_1830	18.0122	48.3366	0.00121685	1.42414
ENSSSCG00000013270	24.5898	53.5304	0.00121685	1.1223
ENSSSCG00000016929	14.8746	30.9173	0.00121685	1.05556
ENSSSCG00000013393	0.430814	1.76161	0.00121685	2.03175
pig_newGene_4191	384.278	180.65	0.00121685	-1.08895
ENSSSCG00000021006	3.44883	0.642711	0.00541722	-2.42386
ENSSSCG00000015893	0.569058	1.50345	0.00467898	1.40163
ENSSSCG00000006276	43.0019	90.9327	0.00121685	1.0804
pig_newGene_397	22.6159	7.30757	0.00121685	-1.62987

## Sheet: 120d vs 240d
Ensemble gene ID	FPKM(120d)	FPKM(240d)	FDR	log2(fold change)
ENSSSCG00000006784	3.59573	9.15369	0.00121685	1.34807
ENSSSCG00000014305	200.394	96.4503	0.00221278	-1.05498
ENSSSCG00000009881	1.28857	5.80097	0.00121685	2.17053
ENSSSCG00000004602	27.4415	9.5232	0.00121685	-1.52684
ENSSSCG00000014336	11.7006	111.047	0.00121685	3.24651
ENSSSCG00000004464	1.2748	2.85483	0.00221278	1.16313
ENSSSCG00000028777	0.656977	1.79567	0.00467898	1.4506
ENSSSCG00000025133	1.9962	4.63595	0.00221278	1.21561
ENSSSCG00000008647	1.2733	4.97197	0.00121685	1.96525
pig_newGene_4317	1.86617	0.592761	0.00121685	-1.65456
ENSSSCG00000003139	41.8326	93.3544	0.00121685	1.15809
ENSSSCG00000007508	0.91613	4.0958	0.00121685	2.16052
ENSSSCG00000022236	29.7571	59.983	0.00121685	1.01132
ENSSSCG00000002026	1.12038	3.71537	0.00121685	1.72952
pig_newGene_811	2.50283	12.282	0.00121685	2.29491
ENSSSCG00000002959	6.42379	15.2321	0.00121685	1.24562
ENSSSCG00000001457	32.8089	89.1533	0.00121685	1.4422
pig_newGene_1643	238.843	485.361	0.00308287	1.023
pig_newGene_399	503.591	192.291	0.00121685	-1.38896
ENSSSCG00000014042	10.2952	21.6368	0.00121685	1.07151
ENSSSCG00000022982	7.46511	3.49042	0.00390909	-1.09676
pig_newGene_3401	91.823	37.2794	0.00221278	-1.30048
ENSSSCG00000030900	2.65895	11.5744	0.00121685	2.12201
ENSSSCG00000012171	22.1256	47.8593	0.00121685	1.11308
ENSSSCG00000013318	8.75541	19.8657	0.00221278	1.18203
ENSSSCG00000025588	2.49697	8.55958	0.00121685	1.77736
pig_newGene_844	35.7293	7.92138	0.00121685	-2.17328
ENSSSCG00000015140	63.4488	157.052	0.00121685	1.30758
ENSSSCG00000015960	129.94	44.6108	0.00121685	-1.54238
pig_newGene_2925	1.68745	0.498806	0.00308287	-1.75829
ENSSSCG00000009852	3.05449	1.21293	0.00121685	-1.33244
ENSSSCG00000000735	3.80693	11.5333	0.00121685	1.59911
ENSSSCG00000009720	0.145774	0.966072	0.00121685	2.7284
ENSSSCG00000021418	1.79665	3.66686	0.00866872	1.02923
ENSSSCG00000021251	1.63574	4.32432	0.00742881	1.40253
ENSSSCG00000028355	173.918	541.052	0.00121685	1.63736
ENSSSCG00000008898	5.99001	12.9525	0.00467898	1.11261
ENSSSCG00000027428	37.8396	523.942	0.00121685	3.79144
ENSSSCG00000001252	3.83502	14.0191	0.00121685	1.87008
ENSSSCG00000026647	4.41683	9.28953	0.00121685	1.07259
ENSSSCG00000014670	3.1353	10.5805	0.00121685	1.75473
ENSSSCG00000022945	14.9979	4.52196	0.00121685	-1.72974
pig_newGene_807	5.92263	40.5465	0.00121685	2.77527
ENSSSCG00000016853	3.35694	1.62012	0.00806905	-1.05104
ENSSSCG00000004219	0	3.88457	0.00121685	inf
ENSSSCG00000006312	1.57607	9.02702	0.00121685	2.51792
ENSSSCG00000013273	0.824676	2.66007	0.00541722	1.68957
ENSSSCG00000029441	175.62	36.8589	0.00121685	-2.25237
ENSSSCG00000004125	0.488456	1.725	0.00806905	1.8203
ENSSSCG00000004509	0.927084	2.44383	0.00308287	1.39837
ENSSSCG00000010199	1.62037	4.13291	0.00121685	1.35083
ENSSSCG00000024750	2.66952	6.29227	0.00390909	1.237
ENSSSCG00000007358	1.30435	3.01596	0.00121685	1.20928
ENSSSCG00000025831	21.207	240.519	0.00121685	3.50354
ENSSSCG00000008772	6.55274	3.0574	0.00221278	-1.0998
ENSSSCG00000004572	0.730047	10.3493	0.00121685	3.8254
ENSSSCG00000020781	1.87833	0.818998	0.00541722	-1.19752
ENSSSCG00000015383	0.895031	2.0794	0.00308287	1.21616
ENSSSCG00000002831	5.02214	2.18835	0.00742881	-1.19846
ENSSSCG00000020876	0.358197	1.54978	0.00221278	2.11324
ENSSSCG00000025106	7.58245	3.11057	0.00390909	-1.28549
ENSSSCG00000028872	1.1918	4.87926	0.00121685	2.03352
ENSSSCG00000001759	27.7197	128.97	0.00121685	2.21805
ENSSSCG00000023374	7.53047	15.3913	0.00926216	1.0313
ENSSSCG00000003485	3.12921	6.52212	0.00541722	1.05954
ENSSSCG00000005665	2.02995	5.71168	0.00308287	1.49247
ENSSSCG00000027378	0.417895	1.30175	0.00121685	1.63924
ENSSSCG00000026996	5.81916	1.51924	0.00121685	-1.93746
ENSSSCG00000002279	6.62439	26.2222	0.00121685	1.98493
ENSSSCG00000011927	166.606	80.6738	0.00308287	-1.04627
ENSSSCG00000015617	5.15982	47.3393	0.00121685	3.19764
ENSSSCG00000003493	107.698	215.922	0.00221278	1.00353
ENSSSCG00000029507	10.7788	3.41053	0.00121685	-1.66013
ENSSSCG00000003065	1.08302	5.39483	0.00121685	2.31652
ENSSSCG00000006105	4.42812	10.9829	0.00308287	1.31049
ENSSSCG00000003897	2.10367	7.60552	0.00121685	1.85414
ENSSSCG00000004120	2.8402	1.26107	0.00308287	-1.17134
ENSSSCG00000027372	1.47552	4.53052	0.00121685	1.61845
ENSSSCG00000002554	1.0112	2.82638	0.00926216	1.48289
ENSSSCG00000025447	46.8171	101.646	0.00121685	1.11845
ENSSSCG00000002907	223.506	456.328	0.00221278	1.02976
ENSSSCG00000027660	3.92813	12.2117	0.00121685	1.63635
ENSSSCG00000005899	4.9517	12.5059	0.00467898	1.33661
ENSSSCG00000002389	0.825361	2.46637	0.00121685	1.57929
ENSSSCG00000015368	1.64961	6.1732	0.00742881	1.90389
ENSSSCG00000028010	1.1532	3.14221	0.00308287	1.44614
ENSSSCG00000001906	0.144758	2.43466	0.00121685	4.072
pig_newGene_105	0.882178	0.197073	0.00866872	-2.16234
ENSSSCG00000010389	89.964	40.6669	0.00221278	-1.14549
ENSSSCG00000014136	1.37043	3.10991	0.00611378	1.18224
ENSSSCG00000025814	49.0962	99.8019	0.00121685	1.02346
ENSSSCG00000021503	1.83923	5.69346	0.00121685	1.63021
ENSSSCG00000010526	15.6594	44.8491	0.00121685	1.51805
ENSSSCG00000010554	10.8963	34.2786	0.00121685	1.65348
ENSSSCG00000005530	0.569414	1.86652	0.00121685	1.7128
ENSSSCG00000004830	0.524198	1.44536	0.00121685	1.46325
ENSSSCG00000009482	9.02332	26.569	0.00121685	1.55801
ENSSSCG00000028552	3.70549	1.19285	0.00121685	-1.63525
ENSSSCG00000024936	4.59971	9.83693	0.00742881	1.09666
ENSSSCG00000003766	84.0865	224.73	0.00121685	1.41825
ENSSSCG00000028512	3.26926	26.1691	0.00121685	3.00083
ENSSSCG00000010224	0.699649	3.02689	0.00121685	2.11313
pig_newGene_3402	111.058	39.6548	0.00221278	-1.48575
ENSSSCG00000022199	5.89596	12.2666	0.00390909	1.05693
ENSSSCG00000014934	6.5735	14.7941	0.00121685	1.17029
ENSSSCG00000025240	135.155	42.0643	0.00121685	-1.68395
ENSSSCG00000010569	42.5467	15.3707	0.00121685	-1.46886
ENSSSCG00000016751	1.667	4.90789	0.00121685	1.55785
ENSSSCG00000016717	6.5875	2.00449	0.00121685	-1.7165
ENSSSCG00000012896	116.213	261.98	0.00121685	1.17269
ENSSSCG00000029168	5.7019	2.49161	0.00121685	-1.19437
ENSSSCG00000009825	51.7494	23.7449	0.00121685	-1.12392
ENSSSCG00000017124	11.6302	3.33288	0.00121685	-1.80304
ENSSSCG00000024161	6.08106	16.5026	0.00121685	1.4403
ENSSSCG00000000171	1.93803	6.09128	0.00121685	1.65216
pig_newGene_1688	0.116067	1.72353	0.00121685	3.89233
pig_newGene_794	1.29148	2.94396	0.00866872	1.18873
ENSSSCG00000010624	0.561774	2.81515	0.00121685	2.32515
ENSSSCG00000010756	11.616	33.4434	0.00121685	1.5256
ENSSSCG00000012766	28.6225	57.4047	0.00221278	1.00402
ENSSSCG00000012160	4.83944	2.09536	0.00742881	-1.20765
ENSSSCG00000007586	4.89459	15.0911	0.00121685	1.62443
ENSSSCG00000012525	1.00135	4.66331	0.00806905	2.21941
ENSSSCG00000004803	37.6858	170.404	0.00121685	2.17687
ENSSSCG00000022368	1.84082	5.98588	0.00121685	1.70121
pig_newGene_2475	0.685558	3.34822	0.00221278	2.28804
ENSSSCG00000017422	2.92975	9.25295	0.00121685	1.65914
ENSSSCG00000013011	3.94092	8.85061	0.00467898	1.16725
ENSSSCG00000000138	16.4262	89.4935	0.00121685	2.44578
ENSSSCG00000004415	1.63933	6.27548	0.00121685	1.93662
pig_newGene_2892	0.602687	1.91679	0.00221278	1.66922
ENSSSCG00000022783	46.8821	18.8493	0.00121685	-1.31453
pig_newGene_1673	20.9668	50.65	0.00121685	1.27246
ENSSSCG00000010429	3.13694	17.0856	0.00121685	2.44535
ENSSSCG00000003527	0.315654	0.931391	0.00679118	1.56104
ENSSSCG00000030325	1.77498	8.20821	0.00121685	2.20926
ENSSSCG00000017581	414.035	1487.23	0.00121685	1.8448
ENSSSCG00000000774	2.09876	7.98894	0.00121685	1.92847
ENSSSCG00000003950	5.02799	10.5113	0.00221278	1.06388
ENSSSCG00000008245	110.499	312.366	0.00121685	1.4992
ENSSSCG00000024144	251.906	579.5	0.00121685	1.20192
ENSSSCG00000014362	39.7267	91.3155	0.00611378	1.20075
ENSSSCG00000016287	1.11298	3.3343	0.00611378	1.58296
ENSSSCG00000000853	17.3218	8.34587	0.00121685	-1.05346
ENSSSCG00000016653	38.1113	18.3365	0.00308287	-1.0555
ENSSSCG00000006891	27.3606	9.14424	0.00121685	-1.58117
ENSSSCG00000017141	0.650303	1.65782	0.00121685	1.3501
ENSSSCG00000007737	3.08042	9.65533	0.00121685	1.6482
pig_newGene_647	14.5423	31.1114	0.00742881	1.09718
ENSSSCG00000020915	10.0609	31.9893	0.00121685	1.66883
ENSSSCG00000000795	1.33583	3.94131	0.00308287	1.56094
ENSSSCG00000030270	3.77681	7.63776	0.00806905	1.01598
ENSSSCG00000025766	111.666	244.599	0.00121685	1.13122
ENSSSCG00000006328	12.3261	26.0195	0.00221278	1.07787
ENSSSCG00000013349	17.9557	8.22039	0.00121685	-1.12716
ENSSSCG00000006335	0.486906	1.38968	0.00986568	1.51304
ENSSSCG00000000261	32.1992	82.097	0.00121685	1.35031
ENSSSCG00000012508	0.871976	5.97521	0.00121685	2.77663
ENSSSCG00000014187	5.23868	1.81925	0.00121685	-1.52586
ENSSSCG00000003629	20.1461	9.38106	0.00121685	-1.10268
ENSSSCG00000017473	0.408349	1.82811	0.00121685	2.16248
ENSSSCG00000005604	1.11429	6.8245	0.00121685	2.6146
ENSSSCG00000029421	20.2238	50.7107	0.00121685	1.32623
ENSSSCG00000021409	14.096	31.3543	0.00308287	1.15338
ENSSSCG00000012705	1.32273	0.129422	0.00467898	-3.35336
ENSSSCG00000026974	16.1892	5.9795	0.00121685	-1.43693
ENSSSCG00000012234	4.10144	12.8884	0.00121685	1.65187
ENSSSCG00000016322	11.1088	27.5406	0.00121685	1.30986
ENSSSCG00000029195	15.7903	6.70643	0.00308287	-1.23542
ENSSSCG00000007366	0.408354	1.73865	0.00390909	2.09008
ENSSSCG00000002025	2.76667	5.66864	0.00679118	1.03485
ENSSSCG00000011849	4.75234	11.8489	0.00121685	1.31805
ENSSSCG00000001377	3.55273	10.1184	0.00121685	1.50998
ENSSSCG00000010200	5.90085	2.81656	0.00121685	-1.06699
ENSSSCG00000005743	1.17964	3.32993	0.00121685	1.49715
ENSSSCG00000008833	103.651	44.8944	0.00121685	-1.20712
ENSSSCG00000021791	1.79414	0.764599	0.00806905	-1.23052
ENSSSCG00000008727	0.926736	3.05907	0.00221278	1.72286
ENSSSCG00000024596	2.2493	4.70055	0.00866872	1.06335
ENSSSCG00000003857	37.9749	9.53998	0.00121685	-1.99299
ENSSSCG00000001785	3.27837	9.17478	0.00121685	1.48469
ENSSSCG00000007817	5.46591	15.1257	0.00121685	1.46847
ENSSSCG00000010570	0.180577	2.79566	0.00121685	3.95251
ENSSSCG00000012026	2.31915	6.85625	0.00121685	1.56383
ENSSSCG00000002837	11.8755	4.02807	0.00121685	-1.55983
ENSSSCG00000006009	5.54342	11.1651	0.00986568	1.01015
ENSSSCG00000022998	7.46062	15.991	0.00308287	1.09989
ENSSSCG00000006919	0.549362	3.38865	0.00121685	2.62488
ENSSSCG00000001068	35.0251	15.198	0.00121685	-1.20451
ENSSSCG00000012548	1.66651	8.61263	0.00121685	2.36962
pig_newGene_439	107.289	422.225	0.00121685	1.97651
ENSSSCG00000013017	58.8101	128.771	0.00121685	1.13067
ENSSSCG00000009110	388.729	163.064	0.00121685	-1.25333
ENSSSCG00000012982	3.66357	8.74653	0.00121685	1.25546
ENSSSCG00000012509	18.603	38.2215	0.00121685	1.03885
ENSSSCG00000004052	2.58414	7.72454	0.00121685	1.57977
ENSSSCG00000030731	412.282	977.709	0.00121685	1.24577
ENSSSCG00000025868	18.3181	45.2047	0.00121685	1.30321
ENSSSCG00000005650	3.93252	10.0449	0.00221278	1.35293
ENSSSCG00000004884	8.23382	3.85416	0.00121685	-1.09515
ENSSSCG00000004058	4.73945	10.3285	0.00308287	1.12384
ENSSSCG00000017416	0.388961	3.37598	0.00121685	3.11761
pig_newGene_91	3.47768	0.6005	0.00121685	-2.53389
ENSSSCG00000005628	43.2592	120.426	0.00121685	1.47707
ENSSSCG00000016266	78.7655	32.1059	0.00121685	-1.29473
pig_newGene_3622	496.836	1326.19	0.00121685	1.41645
ENSSSCG00000004357	0.585427	1.96477	0.00121685	1.7468
ENSSSCG00000015566	5.27639	2.39166	0.00467898	-1.14154
ENSSSCG00000011874	0.670611	2.05327	0.00121685	1.61438
ENSSSCG00000014387	89.7269	18.762	0.00121685	-2.25773
ENSSSCG00000026412	1.53934	3.99752	0.00467898	1.3768
ENSSSCG00000023888	1.95782	8.05349	0.00121685	2.04036
ENSSSCG00000028941	1.33653	0	0.00121685	#NAME?
ENSSSCG00000016720	3278.45	8083.32	0.00866872	1.30194
ENSSSCG00000028492	10.5523	2.88867	0.00121685	-1.86908
ENSSSCG00000024614	6.96482	15.8238	0.00121685	1.18394
ENSSSCG00000017579	77.1583	312.273	0.00121685	2.01691
ENSSSCG00000006829	131.857	281.179	0.00806905	1.09251
ENSSSCG00000003433	8.97551	18.4842	0.00221278	1.04222
ENSSSCG00000002009	0.222656	1.11121	0.00866872	2.31925
ENSSSCG00000007268	0.384477	1.58123	0.00221278	2.04008
ENSSSCG00000009361	1.95804	16.1682	0.00121685	3.04567
ENSSSCG00000005614	4.28811	8.73587	0.00390909	1.02661
ENSSSCG00000022953	9.1535	3.58568	0.00121685	-1.35208
pig_newGene_421	7.3889	3.49265	0.00308287	-1.08104
ENSSSCG00000029023	4.31943	16.6565	0.00121685	1.94717
ENSSSCG00000024015	1.238	3.05639	0.00121685	1.30382
ENSSSCG00000022891	3.08601	10.5905	0.00679118	1.77895
pig_newGene_3036	4.98107	25.6017	0.00121685	2.36171
ENSSSCG00000011400	3.47064	7.36121	0.00390909	1.08474
ENSSSCG00000028326	79.5107	222.907	0.00121685	1.48722
pig_newGene_110	5.18026	1.84536	0.00121685	-1.48912
ENSSSCG00000016408	172.844	82.3309	0.00541722	-1.06997
ENSSSCG00000004289	1.05341	0.385685	0.00308287	-1.44957
ENSSSCG00000017087	2.29643	5.70466	0.00121685	1.31275
ENSSSCG00000014314	0.345636	1.92873	0.00221278	2.48032
ENSSSCG00000017146	1.03355	4.03368	0.00121685	1.96449
pig_newGene_3895	26.2834	76.3912	0.00121685	1.53926
ENSSSCG00000011414	4.38053	27.124	0.00121685	2.6304
ENSSSCG00000009157	1.7141	4.43652	0.00121685	1.37198
ENSSSCG00000027352	5.09029	1.92467	0.00121685	-1.40313
ENSSSCG00000021529	7.56443	1.17683	0.00121685	-2.68433
ENSSSCG00000022797	10.8604	23.6404	0.00221278	1.12217
ENSSSCG00000029509	0.41328	3.04558	0.00121685	2.88153
ENSSSCG00000005750	2.44803	8.40512	0.00121685	1.77965
ENSSSCG00000024771	0.620386	1.84303	0.00742881	1.57084
ENSSSCG00000003524	19.8024	50.4907	0.00121685	1.35034
ENSSSCG00000022506	34.6352	85.1426	0.00121685	1.29764
ENSSSCG00000022925	1.92336	5.45157	0.00121685	1.50304
ENSSSCG00000004607	11.2146	4.16882	0.00806905	-1.42766
ENSSSCG00000028090	5.54555	11.7803	0.00390909	1.08697
ENSSSCG00000017273	29.7959	12.1438	0.00121685	-1.29489
pig_newGene_1857	19.0022	8.26084	0.00121685	-1.20181
ENSSSCG00000006474	2.25305	6.87633	0.00121685	1.60976
ENSSSCG00000003006	5.65394	0.943447	0.00121685	-2.58324
pig_newGene_2761	12.3554	3.98528	0.00308287	-1.63239
ENSSSCG00000017927	2.77232	6.19691	0.00121685	1.16045
ENSSSCG00000027580	3.53046	8.40115	0.00121685	1.25073
ENSSSCG00000007978	166.252	662.865	0.00121685	1.99535
ENSSSCG00000003763	1.51565	6.58043	0.00121685	2.11824
pig_newGene_1202	0.564486	1.88848	0.00121685	1.74222
ENSSSCG00000021596	2.44845	8.32386	0.00121685	1.76538
ENSSSCG00000017788	1.89993	5.06367	0.00541722	1.41423
ENSSSCG00000015435	116.032	47.6503	0.00121685	-1.28397
ENSSSCG00000005465	0.289076	0.810954	0.00611378	1.48817
ENSSSCG00000010292	14.451	35.8429	0.00121685	1.31052
pig_newGene_1516	2.16921	7.23646	0.00121685	1.73812
ENSSSCG00000010806	3.17044	21.9599	0.00121685	2.79212
ENSSSCG00000003525	22.1607	48.5517	0.00221278	1.13152
ENSSSCG00000025688	156.543	316.901	0.00121685	1.01748
ENSSSCG00000003859	6.79627	3.17232	0.00121685	-1.0992
ENSSSCG00000022204	2.51344	8.1098	0.00121685	1.69
ENSSSCG00000030548	0.303825	1.31082	0.00121685	2.10916
ENSSSCG00000017754	2.6303	18.6665	0.00121685	2.82715
pig_newGene_894	5.86562	13.053	0.00611378	1.15403
ENSSSCG00000005762	4.87545	2.06663	0.00121685	-1.23826
pig_newGene_3766	40.076	16.8477	0.00121685	-1.25019
pig_newGene_9	1.80741	4.36591	0.00121685	1.27236
ENSSSCG00000027684	336.451	156.611	0.00467898	-1.10321
pig_newGene_4067	14.7647	47.2639	0.00121685	1.67859
ENSSSCG00000006655	11.665	3.24764	0.00121685	-1.84473
ENSSSCG00000009049	6.70325	3.11492	0.00121685	-1.10567
ENSSSCG00000011951	0.352781	1.72144	0.00121685	2.28677
ENSSSCG00000023379	4.32006	20.1111	0.00121685	2.21887
ENSSSCG00000026023	8.50196	2.22469	0.00806905	-1.93419
ENSSSCG00000003253	24.8589	64.3672	0.00121685	1.37256
ENSSSCG00000000806	11.4869	5.68439	0.00121685	-1.01491
ENSSSCG00000006955	3.35984	9.74331	0.00121685	1.53602
ENSSSCG00000015249	0.575787	13.6159	0.00121685	4.56362
ENSSSCG00000005126	12.0315	4.2115	0.00121685	-1.51442
ENSSSCG00000024623	38.375	18.5034	0.00121685	-1.05237
ENSSSCG00000002919	7.61494	18.6438	0.00541722	1.29179
ENSSSCG00000009638	2.62423	8.94948	0.00121685	1.76991
ENSSSCG00000001914	2.20323	5.11766	0.00541722	1.21587
ENSSSCG00000026816	0.190619	1.14619	0.00611378	2.58808
ENSSSCG00000016991	112.698	247.667	0.00121685	1.13594
ENSSSCG00000026784	3.65692	9.10327	0.00121685	1.31576
ENSSSCG00000005015	8.971	4.39463	0.00121685	-1.02953
ENSSSCG00000004525	4.10187	9.01819	0.00541722	1.13656
ENSSSCG00000030839	107.561	272.621	0.00121685	1.34174
ENSSSCG00000013013	49.8171	101.538	0.00221278	1.0273
ENSSSCG00000030378	51.5562	17.3123	0.00121685	-1.57435
ENSSSCG00000012448	8.28097	17.9783	0.00742881	1.11838
ENSSSCG00000004789	8.49022	25.3751	0.00121685	1.57954
ENSSSCG00000006352	16.4969	44.0849	0.00121685	1.41809
ENSSSCG00000013784	14.6641	197.688	0.00121685	3.75287
ENSSSCG00000022283	3.3951	1.06423	0.00121685	-1.67364
ENSSSCG00000027611	1.79681	3.96801	0.00121685	1.14298
ENSSSCG00000001963	5.95341	13.1257	0.00121685	1.14061
ENSSSCG00000003017	5.36314	11.2249	0.00308287	1.06556
ENSSSCG00000006216	10.7663	22.3069	0.00611378	1.05097
ENSSSCG00000014016	619.057	210.855	0.00121685	-1.55382
ENSSSCG00000027525	2.78683	6.39066	0.00121685	1.19734
ENSSSCG00000017429	3.23508	7.33137	0.00221278	1.18028
ENSSSCG00000015798	1.44108	8.37451	0.00121685	2.53885
ENSSSCG00000000672	0.78547	3.18791	0.00679118	2.02098
ENSSSCG00000014838	17.2975	3.74766	0.00121685	-2.2065
ENSSSCG00000007331	3.64162	1.70407	0.00221278	-1.09559
ENSSSCG00000005970	0.63519	2.03938	0.00121685	1.68287
ENSSSCG00000016866	40.4962	18.9123	0.00308287	-1.09846
ENSSSCG00000015940	106.006	37.521	0.00121685	-1.49837
ENSSSCG00000024692	3.46205	8.09426	0.00121685	1.22527
ENSSSCG00000022343	56.22	157.964	0.00121685	1.49044
pig_newGene_641	4.45803	1.50508	0.00221278	-1.56656
ENSSSCG00000029633	24.048	11.3595	0.00121685	-1.08202
ENSSSCG00000010831	6.66395	20.4133	0.00121685	1.61506
ENSSSCG00000011264	9.45602	20.8708	0.00611378	1.14218
ENSSSCG00000006187	0.528966	2.22622	0.00121685	2.07335
pig_newGene_3289	28.475	338.885	0.00121685	3.57303
ENSSSCG00000013354	266.237	110.251	0.00121685	-1.27192
ENSSSCG00000010109	2.23564	5.38792	0.00121685	1.26904
ENSSSCG00000007895	13.5784	5.10444	0.00121685	-1.41149
pig_newGene_22	15.1216	3.48066	0.00121685	-2.11918
ENSSSCG00000000917	1.48859	4.19824	0.00679118	1.49584
ENSSSCG00000001229	276.74	711.408	0.00121685	1.36215
ENSSSCG00000021712	4.06785	10.5789	0.00121685	1.37885
ENSSSCG00000012014	2.46938	6.27627	0.00467898	1.34576
pig_newGene_1486	10.5179	2.36021	0.00121685	-2.15586
ENSSSCG00000011133	3.85903	10.5932	0.00121685	1.45682
ENSSSCG00000024627	0.892896	0	0.00121685	#NAME?
ENSSSCG00000007565	3.00975	6.84453	0.00121685	1.18531
pig_newGene_3753	175.758	447.763	0.00121685	1.34914
ENSSSCG00000017352	23.4161	11.1482	0.00679118	-1.07069
ENSSSCG00000002550	311.973	664.389	0.00121685	1.09061
ENSSSCG00000004919	6.68217	1.96363	0.00121685	-1.7668
ENSSSCG00000029231	0.181644	0.915285	0.00467898	2.33311
pig_newGene_3076	7.41192	31.3946	0.00541722	2.0826
ENSSSCG00000004557	26.6662	55.8935	0.00467898	1.06767
ENSSSCG00000003079	4.19538	17.5053	0.00121685	2.06092
pig_newGene_1836	34.1237	12.846	0.00121685	-1.40945
ENSSSCG00000012699	3252.99	1076.44	0.00390909	-1.59549
ENSSSCG00000018052	8.12752	23.7906	0.00121685	1.54951
pig_newGene_558	1.47762	12.8737	0.00121685	3.12308
ENSSSCG00000021071	334.942	105.747	0.00121685	-1.6633
ENSSSCG00000009341	4.36659	1.46901	0.00121685	-1.57166
pig_newGene_2273	60.937	144.019	0.00121685	1.24087
pig_newGene_1422	10.291	4.53962	0.00121685	-1.18074
ENSSSCG00000027170	4.55311	1.87349	0.00806905	-1.28112
pig_newGene_3940	17.5867	115.429	0.00121685	2.71445
ENSSSCG00000003471	1.76737	3.9832	0.00221278	1.17232
ENSSSCG00000017421	4.27385	11.2105	0.00121685	1.39125
ENSSSCG00000001703	1.74142	4.98054	0.00541722	1.51604
ENSSSCG00000026296	5.70903	24.6292	0.00221278	2.10905
pig_newGene_3714	9.81762	31.3724	0.00121685	1.67605
ENSSSCG00000002008	184.132	423.413	0.00866872	1.20133
ENSSSCG00000029558	3.4162	8.73403	0.00121685	1.35425
ENSSSCG00000011510	4.00197	1.65934	0.00121685	-1.2701
pig_newGene_1492	2.08633	0	0.00121685	#NAME?
ENSSSCG00000020666	1.91787	4.1563	0.00308287	1.11579
ENSSSCG00000013517	0.207633	1.22744	0.00121685	2.56355
ENSSSCG00000029034	612.364	1245.59	0.00742881	1.02436
ENSSSCG00000010219	5.82704	13.4345	0.00221278	1.20511
ENSSSCG00000001472	0.765381	2.73423	0.00121685	1.83688
ENSSSCG00000028736	6.34971	83.8254	0.00121685	3.72263
ENSSSCG00000004603	5.49172	1.99572	0.00121685	-1.46035
ENSSSCG00000023377	4.90857	13.8439	0.00121685	1.49587
ENSSSCG00000022850	0.36547	1.05019	0.00986568	1.52282
ENSSSCG00000027903	60.6686	9.64615	0.00121685	-2.65292
ENSSSCG00000007460	2.50548	1.1795	0.00221278	-1.08692
ENSSSCG00000005965	7.75379	20.2007	0.00121685	1.38143
ENSSSCG00000009630	0.359521	2.86767	0.00121685	2.99573
ENSSSCG00000003393	17.7434	6.8205	0.00121685	-1.37933
ENSSSCG00000008061	218.755	476.949	0.00121685	1.12452
pig_newGene_2425	3.68173	12.6822	0.00121685	1.78435
pig_newGene_648	17.7811	40.1543	0.00121685	1.17521
ENSSSCG00000029185	51.6541	21.7553	0.00121685	-1.24751
ENSSSCG00000001341	35.6668	93.6563	0.00121685	1.3928
ENSSSCG00000021597	3.81156	27.9145	0.00121685	2.87256
ENSSSCG00000007239	1.26726	2.98177	0.00866872	1.23445
ENSSSCG00000005751	22.3641	55.653	0.00121685	1.31527
ENSSSCG00000005278	7.06132	2.06205	0.00121685	-1.77586
ENSSSCG00000001800	9.10847	23.6834	0.00308287	1.3786
ENSSSCG00000014395	1.35796	3.562	0.00121685	1.39125
ENSSSCG00000026161	36.6939	16.8959	0.00121685	-1.11887
ENSSSCG00000000521	1.02537	6.28775	0.00121685	2.61639
pig_newGene_3455	19.4759	5.53118	0.00121685	-1.81603
ENSSSCG00000011885	95.0307	36.0037	0.00121685	-1.40025
ENSSSCG00000026755	16.1046	6.32038	0.00121685	-1.34939
ENSSSCG00000009495	4.36237	1.38563	0.00121685	-1.65457
ENSSSCG00000021646	34.4936	16.1048	0.00121685	-1.09884
ENSSSCG00000011398	3.58735	8.3298	0.00221278	1.21537
ENSSSCG00000029781	18.7472	47.4947	0.00308287	1.34109
ENSSSCG00000004241	5.94166	18.0349	0.00121685	1.60185
ENSSSCG00000003479	4.70731	16.4619	0.00121685	1.80616
pig_newGene_2729	6.46938	14.7173	0.00467898	1.18581
pig_newGene_795	2.09917	4.77054	0.00467898	1.18433
ENSSSCG00000009592	7.09008	27.0577	0.00121685	1.93216
ENSSSCG00000016585	1.97615	4.34671	0.00926216	1.13724
ENSSSCG00000027738	53.7468	23.3006	0.00121685	-1.20581
ENSSSCG00000012805	2.06251	0.455468	0.00121685	-2.17898
ENSSSCG00000021943	223.886	819.4	0.00121685	1.8718
ENSSSCG00000010341	7.49625	15.3658	0.00986568	1.03548
ENSSSCG00000010312	5.02382	19.9995	0.00121685	1.99311
ENSSSCG00000029763	2.11054	5.34099	0.00679118	1.33949
ENSSSCG00000022908	21.0135	47.3844	0.00308287	1.17309
ENSSSCG00000026116	88.4653	39.9516	0.00121685	-1.14686
pig_newGene_1191	1.3539	0.346877	0.00467898	-1.96462
ENSSSCG00000008412	35.9123	14.0442	0.00121685	-1.3545
ENSSSCG00000016288	0.226904	7.45194	0.00121685	5.03747
ENSSSCG00000006267	107.524	35.3284	0.00121685	-1.60576
ENSSSCG00000007202	6.83481	18.509	0.00121685	1.43726
ENSSSCG00000021595	231.206	771.776	0.00121685	1.739
ENSSSCG00000008736	2.10179	0.690849	0.00121685	-1.60518
ENSSSCG00000002051	49.985	24.0504	0.00121685	-1.05543
ENSSSCG00000016618	4.37919	1.52674	0.00611378	-1.52021
ENSSSCG00000011322	0.361643	1.12875	0.00926216	1.64208
ENSSSCG00000024430	0.700248	3.51909	0.00121685	2.32927
ENSSSCG00000006729	1.26551	4.24229	0.00121685	1.74513
ENSSSCG00000029592	0.646874	2.12218	0.00308287	1.71399
ENSSSCG00000017731	134.253	59.5816	0.00221278	-1.17202
ENSSSCG00000015334	722.317	96.2721	0.00121685	-2.90744
ENSSSCG00000014812	12.0326	31.4935	0.00121685	1.38811
ENSSSCG00000006256	3.17297	6.61903	0.00986568	1.06079
ENSSSCG00000010980	10.4337	3.91676	0.00121685	-1.41352
ENSSSCG00000016792	54.9191	24.3203	0.00121685	-1.17515
ENSSSCG00000017623	1.40393	0.470786	0.00308287	-1.57633
ENSSSCG00000021161	0.785179	3.69534	0.00121685	2.23461
ENSSSCG00000005668	7.78061	19.8385	0.00121685	1.35035
ENSSSCG00000001988	2.44474	5.00083	0.00679118	1.03249
ENSSSCG00000001561	0.132743	0.752208	0.00742881	2.5025
ENSSSCG00000016823	2.49062	5.75555	0.00221278	1.20845
ENSSSCG00000030134	1291.98	616.206	0.00308287	-1.0681
ENSSSCG00000005058	4.48839	1.56275	0.00121685	-1.52212
ENSSSCG00000009668	25.4734	106.312	0.00121685	2.06125
ENSSSCG00000014251	1.43998	3.31469	0.00308287	1.20283
ENSSSCG00000023363	4.99265	10.5809	0.00679118	1.08358
ENSSSCG00000002557	28.9923	94.1125	0.00121685	1.69872
ENSSSCG00000013297	3.62986	15.2087	0.00121685	2.06691
ENSSSCG00000025855	9.80378	2.85041	0.00121685	-1.78217
ENSSSCG00000006752	328.078	150.65	0.00467898	-1.12284
ENSSSCG00000023044	35.9566	85.8149	0.00121685	1.25497
ENSSSCG00000021521	4.35569	11.1089	0.00121685	1.35074
pig_newGene_2913	12.9502	34.6532	0.00121685	1.42002
ENSSSCG00000024312	0.847057	3.95386	0.00121685	2.22273
ENSSSCG00000014430	9.88824	20.44	0.00121685	1.04761
ENSSSCG00000025698	9.93816	46.4887	0.00121685	2.22583
ENSSSCG00000016267	8.27448	16.5748	0.00121685	1.00225
pig_newGene_1637	1.23101	2.88758	0.00806905	1.23002
ENSSSCG00000025738	45.2158	19.7555	0.00121685	-1.19457
ENSSSCG00000001081	1.30067	7.7518	0.00121685	2.57528
ENSSSCG00000017160	0.922234	3.25837	0.00121685	1.82095
pig_newGene_536	0.478963	3.60706	0.00121685	2.91284
ENSSSCG00000029772	1.67637	13.0284	0.00121685	2.95824
ENSSSCG00000009856	7.36374	0.698949	0.00121685	-3.39718
pig_newGene_116	0.420161	1.34219	0.00467898	1.67558
ENSSSCG00000023369	48.0124	185.267	0.00121685	1.94813
ENSSSCG00000003155	38.0482	118.659	0.00121685	1.64092
ENSSSCG00000010401	8.05304	3.71807	0.00121685	-1.11498
ENSSSCG00000014539	2.68111	0.942862	0.00221278	-1.50771
ENSSSCG00000013753	6.3201	31.8106	0.00121685	2.33149
ENSSSCG00000009953	16.4455	7.63197	0.00221278	-1.10757
ENSSSCG00000013226	7.83077	17.8996	0.00121685	1.1927
ENSSSCG00000003081	2.28512	8.74274	0.00121685	1.93582
ENSSSCG00000013375	7.37857	56.9993	0.00121685	2.94953
pig_newGene_3053	5.21201	11.2776	0.00221278	1.11354
ENSSSCG00000013658	1.26292	3.13904	0.00390909	1.31356
ENSSSCG00000010631	4.34562	1.30165	0.00121685	-1.73922
ENSSSCG00000014633	28.7922	62.0732	0.00221278	1.10829
ENSSSCG00000011831	75.7362	26.9532	0.00121685	-1.49053
ENSSSCG00000003707	3.72232	1.68294	0.00221278	-1.14522
pig_newGene_1636	48.9923	127.168	0.00679118	1.37611
ENSSSCG00000016450	2.99988	7.02207	0.00121685	1.22699
ENSSSCG00000027248	49.1948	23.1081	0.00467898	-1.09011
ENSSSCG00000009947	0.461774	1.71314	0.00121685	1.89138
ENSSSCG00000022728	6.78286	23.3326	0.00121685	1.78238
ENSSSCG00000001873	1.0061	2.12049	0.00611378	1.07562
ENSSSCG00000009242	8.22931	4.02527	0.00121685	-1.03169
ENSSSCG00000014248	1.78731	4.24159	0.00390909	1.24682
pig_newGene_124	2.60799	5.84118	0.00742881	1.16332
ENSSSCG00000016997	0.484363	2.72239	0.00121685	2.49071
ENSSSCG00000013147	0.243622	1.36408	0.00121685	2.48521
ENSSSCG00000015106	5.31933	11.5893	0.00121685	1.12348
pig_newGene_3022	114.936	686.152	0.00121685	2.57769
pig_newGene_851	11.7321	25.5786	0.00986568	1.12448
ENSSSCG00000011727	4.72255	26.1463	0.00121685	2.46897
ENSSSCG00000004561	1.61786	0.730015	0.00121685	-1.14809
ENSSSCG00000021359	4.4033	9.44842	0.00611378	1.10149
ENSSSCG00000024526	1.79085	4.68491	0.00308287	1.38738
ENSSSCG00000011658	8.76053	4.35438	0.00121685	-1.00855
ENSSSCG00000000866	1198.48	485.058	0.00742881	-1.30498
ENSSSCG00000021429	2.16769	4.86494	0.00121685	1.16626
ENSSSCG00000016348	3.34688	1.33055	0.00308287	-1.33079
ENSSSCG00000014003	1.23545	3.00715	0.00308287	1.28336
ENSSSCG00000014618	0.453637	1.23886	0.00308287	1.4494
ENSSSCG00000028771	35.9883	13.7046	0.00121685	-1.39287
ENSSSCG00000011387	39.1564	14.7596	0.00121685	-1.40759
ENSSSCG00000022967	0.228368	0.774778	0.00806905	1.76242
ENSSSCG00000010140	0.5888	2.80812	0.00121685	2.25375
ENSSSCG00000002135	1.61074	4.95333	0.00390909	1.62068
ENSSSCG00000013909	0.921854	3.25436	0.00308287	1.81976
ENSSSCG00000012347	1.8553	5.38743	0.00541722	1.53794
pig_newGene_4254	2.70961	12.5952	0.00121685	2.21672
ENSSSCG00000010253	5.89743	11.9466	0.00308287	1.01844
ENSSSCG00000007391	1.00615	6.48422	0.00121685	2.68808
ENSSSCG00000007170	4.27178	10.8636	0.00121685	1.3466
pig_newGene_1858	0.517441	1.69291	0.00121685	1.71004
ENSSSCG00000028063	46.3828	18.9348	0.00221278	-1.29255
ENSSSCG00000015320	0.342883	1.15682	0.00390909	1.75438
ENSSSCG00000006873	1.11849	5.76913	0.00121685	2.3668
ENSSSCG00000009334	25.5605	145.338	0.00121685	2.50742
pig_newGene_798	25.9248	75.077	0.00121685	1.53404
ENSSSCG00000003059	10.8327	24.9879	0.00121685	1.20584
ENSSSCG00000014274	5.0445	13.3205	0.00221278	1.40087
ENSSSCG00000021973	9.57876	20.3576	0.00541722	1.08765
ENSSSCG00000029275	27.7621	8.49446	0.00121685	-1.70852
ENSSSCG00000008959	3.90855	15.4576	0.00121685	1.98361
ENSSSCG00000023837	2.6228	9.46494	0.00541722	1.85149
ENSSSCG00000021328	3.67024	9.22724	0.00308287	1.33002
ENSSSCG00000014880	1.19952	3.22346	0.00390909	1.42615
ENSSSCG00000002002	5.9792	18.9436	0.00121685	1.66369
ENSSSCG00000010517	17.56	36.8611	0.00611378	1.06981
ENSSSCG00000001456	17.0382	54.3685	0.00121685	1.674
ENSSSCG00000013735	18.3989	69.0694	0.00121685	1.90843
ENSSSCG00000006274	1.20015	0.570516	0.00390909	-1.07287
ENSSSCG00000026182	4.19993	33.6047	0.00121685	3.00023
ENSSSCG00000003398	8.13567	3.77288	0.00308287	-1.1086
ENSSSCG00000011243	47.2856	11.6998	0.00121685	-2.01491
ENSSSCG00000023594	32.4594	104.762	0.00121685	1.69041
ENSSSCG00000029414	0.394723	2.69676	0.00308287	2.77232
ENSSSCG00000006496	60.5208	126.444	0.00121685	1.06299
ENSSSCG00000000660	11.9359	0.176936	0.00121685	-6.07594
ENSSSCG00000026249	130.75	52.0946	0.00121685	-1.32761
ENSSSCG00000010941	3.66728	1.54353	0.00121685	-1.24848
ENSSSCG00000013427	39.6361	15.6428	0.00121685	-1.34132
ENSSSCG00000016851	1.81563	3.875	0.00390909	1.09372
ENSSSCG00000021742	0.440454	1.51567	0.00866872	1.78289
ENSSSCG00000006630	44.6824	21.4172	0.00121685	-1.06094
ENSSSCG00000013248	0.421053	1.02024	0.00308287	1.27683
ENSSSCG00000002471	15.5469	134.251	0.00121685	3.11023
ENSSSCG00000026554	87.2396	616.053	0.00121685	2.82
ENSSSCG00000013374	5.22989	1.66992	0.00121685	-1.647
ENSSSCG00000000801	4.35956	1.55698	0.00221278	-1.48543
ENSSSCG00000003593	7.73356	3.55158	0.00308287	-1.12267
ENSSSCG00000001455	26.6366	56.1938	0.00121685	1.077
ENSSSCG00000011848	21.1621	70.4552	0.00121685	1.73522
ENSSSCG00000011000	37.4251	292.018	0.00121685	2.96398
pig_newGene_442	6.79037	1.01285	0.00121685	-2.74508
ENSSSCG00000029570	5.69925	13.0054	0.00121685	1.19027
ENSSSCG00000023160	17.582	5.25756	0.00121685	-1.74163
ENSSSCG00000027865	2.27262	0.757514	0.00121685	-1.58501
ENSSSCG00000021585	2.54866	9.66516	0.00121685	1.92305
ENSSSCG00000012294	28.6246	60.2235	0.00121685	1.07307
ENSSSCG00000017861	1.80113	0.494773	0.00121685	-1.86407
ENSSSCG00000001970	6.09284	2.92951	0.00221278	-1.05646
ENSSSCG00000012941	4.93475	11.7709	0.00541722	1.25417
ENSSSCG00000004755	1.17014	4.41716	0.00121685	1.91644
ENSSSCG00000020705	0.506222	2.19643	0.00121685	2.11732
ENSSSCG00000009396	4.16625	10.0663	0.00121685	1.27271
ENSSSCG00000007864	11.1461	23.5323	0.00121685	1.0781
ENSSSCG00000009759	5.77386	11.8317	0.00308287	1.03505
ENSSSCG00000014933	0.801335	0.160032	0.00679118	-2.32404
ENSSSCG00000030276	0.246042	1.02517	0.00121685	2.05889
pig_newGene_71	2.20666	0.474293	0.00986568	-2.21801
ENSSSCG00000012050	31.6047	112.24	0.00121685	1.82837
ENSSSCG00000016925	2.27321	9.54473	0.00121685	2.06997
ENSSSCG00000013614	31.6485	90.2263	0.00121685	1.51141
ENSSSCG00000004560	20.8581	4.96971	0.00121685	-2.06938
ENSSSCG00000011357	11.7949	23.6759	0.00221278	1.00525
ENSSSCG00000000916	16.6215	33.8119	0.00541722	1.02448
ENSSSCG00000025455	6.40657	13.5657	0.00121685	1.08234
ENSSSCG00000010974	19.285	50.3524	0.00121685	1.38458
ENSSSCG00000024342	4.10818	8.99411	0.00467898	1.13048
ENSSSCG00000007369	94.9598	204.103	0.00121685	1.10391
ENSSSCG00000006624	20.7042	42.7018	0.00221278	1.04437
ENSSSCG00000025567	1.23595	5.24091	0.00121685	2.0842
ENSSSCG00000002392	9.68627	21.2646	0.00121685	1.13444
ENSSSCG00000005701	2.61978	5.8885	0.00679118	1.16845
ENSSSCG00000002449	294.854	751.512	0.00121685	1.3498
ENSSSCG00000015333	25.8853	10.7275	0.00121685	-1.27081
ENSSSCG00000030006	0	0.844367	0.00679118	inf
ENSSSCG00000007715	5.73604	14.3779	0.00121685	1.32573
ENSSSCG00000024673	7.49277	18.8456	0.00121685	1.33066
ENSSSCG00000016111	4.71853	12.3008	0.00121685	1.38234
pig_newGene_2530	10.0339	3.76922	0.00121685	-1.41254
ENSSSCG00000000759	1.70824	8.02773	0.00121685	2.23248
ENSSSCG00000028322	43.6296	235.464	0.00121685	2.43213
ENSSSCG00000008598	24.936	55.3784	0.00121685	1.15109
ENSSSCG00000025533	774.995	1647.5	0.00121685	1.08802
ENSSSCG00000007171	0.482967	1.4607	0.00986568	1.59666
ENSSSCG00000005437	6.84744	14.9477	0.00221278	1.12629
ENSSSCG00000015311	3.26063	7.15219	0.00390909	1.13323
pig_newGene_3403	20.6944	48.5143	0.00221278	1.22917
ENSSSCG00000020738	2.85699	9.73191	0.00121685	1.76822
ENSSSCG00000021015	79.9813	341.579	0.00121685	2.09448
ENSSSCG00000008119	0.183246	0.892875	0.00679118	2.28468
ENSSSCG00000011894	12.1484	25.7159	0.00308287	1.08189
ENSSSCG00000011195	10.7488	2.77844	0.00121685	-1.95182
ENSSSCG00000017544	546.669	1125.55	0.00467898	1.04189
ENSSSCG00000025217	7.37685	22.8282	0.00121685	1.62974
ENSSSCG00000026945	114.167	25.6579	0.00121685	-2.15368
ENSSSCG00000000606	115.491	281.178	0.00121685	1.2837
ENSSSCG00000023903	95.0936	218.014	0.00121685	1.197
pig_newGene_125	0.935508	0.28803	0.00121685	-1.69953
ENSSSCG00000000234	2.0555	6.99493	0.00121685	1.76682
ENSSSCG00000012974	26.5956	56.4176	0.00121685	1.08496
ENSSSCG00000027344	399.401	193.543	0.00308287	-1.04518
ENSSSCG00000026257	14.445	36.0913	0.00121685	1.32108
ENSSSCG00000013263	2.77485	9.19452	0.00121685	1.72836
ENSSSCG00000014834	111.826	23.3342	0.00121685	-2.26074
ENSSSCG00000011624	0.436301	1.73945	0.00121685	1.99524
ENSSSCG00000005291	8.96491	25.6084	0.00121685	1.51426
ENSSSCG00000000724	0.764977	2.18228	0.00611378	1.51235
ENSSSCG00000010991	2.90755	7.02389	0.00308287	1.27247
ENSSSCG00000004169	41.5649	20.4283	0.00121685	-1.0248
ENSSSCG00000006815	2.42553	6.9269	0.00121685	1.51391
ENSSSCG00000006140	0.407474	1.88099	0.00121685	2.20671
ENSSSCG00000023690	79.4562	233.637	0.00121685	1.55604
ENSSSCG00000008123	2.54001	13.2148	0.00121685	2.37924
ENSSSCG00000005627	1078.72	3180.52	0.00121685	1.55994
pig_newGene_1061	30.8279	6.09536	0.00121685	-2.33845
ENSSSCG00000008645	3.0828	7.42375	0.00308287	1.26791
ENSSSCG00000017525	105.245	36.2299	0.00121685	-1.5385
ENSSSCG00000000108	5.4062	13.0447	0.00121685	1.27077
ENSSSCG00000022018	46.913	19.7135	0.00121685	-1.2508
ENSSSCG00000008581	8.44983	3.83088	0.00121685	-1.14125
ENSSSCG00000007116	9.63479	24.7414	0.00121685	1.3606
ENSSSCG00000006988	4.5671	12.6178	0.00121685	1.46611
ENSSSCG00000003749	4.97253	2.23475	0.00467898	-1.15387
ENSSSCG00000012832	2.83899	5.97829	0.00121685	1.07436
ENSSSCG00000000293	6.37498	18.3957	0.00121685	1.52888
ENSSSCG00000029359	8.84665	24.1403	0.00121685	1.44824
ENSSSCG00000026731	24.1324	11.539	0.00121685	-1.06445
ENSSSCG00000010130	2.59415	5.26542	0.00221278	1.02129
ENSSSCG00000007557	0.894355	2.61431	0.00121685	1.54751
ENSSSCG00000009364	0.473676	1.49665	0.00866872	1.65977
ENSSSCG00000026454	1.21102	4.38326	0.00121685	1.85578
pig_newGene_568	0.521594	2.72071	0.00121685	2.38298
ENSSSCG00000023496	2052.3	4798.4	0.00541722	1.22531
ENSSSCG00000011233	18.2127	5.53049	0.00121685	-1.71947
pig_newGene_21	10.5989	2.68273	0.00308287	-1.98214
ENSSSCG00000004799	2.49671	0.823666	0.00308287	-1.5999
ENSSSCG00000006924	1.70868	5.92079	0.00121685	1.79291
ENSSSCG00000018058	2.19939	4.76844	0.00221278	1.11641
pig_newGene_2435	8.85961	19.5884	0.00121685	1.14469
ENSSSCG00000028695	0.932149	5.91116	0.00541722	2.66481
ENSSSCG00000015232	1.54156	4.04241	0.00121685	1.39082
ENSSSCG00000030898	9.68306	20.4401	0.00121685	1.07787
ENSSSCG00000026098	555.969	268.451	0.00611378	-1.05034
ENSSSCG00000027466	40.2123	133.552	0.00121685	1.73169
ENSSSCG00000002535	270.189	548.218	0.00742881	1.02078
ENSSSCG00000024752	17.4436	41.0944	0.00308287	1.23625
ENSSSCG00000014012	1.90798	4.6687	0.00121685	1.29097
ENSSSCG00000008478	12.7102	4.41896	0.00121685	-1.52421
ENSSSCG00000016753	3.19382	7.15088	0.00467898	1.16284
ENSSSCG00000025866	2.13606	5.14132	0.00121685	1.26718
pig_newGene_1689	1.49628	4.44756	0.00121685	1.57163
ENSSSCG00000003377	0.313727	2.15061	0.00390909	2.77716
ENSSSCG00000017142	6.22112	14.5456	0.00121685	1.22534
pig_newGene_1879	45.9942	21.1168	0.00121685	-1.12306
pig_newGene_1064	5.19368	1.04098	0.00221278	-2.31881
ENSSSCG00000006725	83.5274	32.3643	0.00121685	-1.36784
ENSSSCG00000021569	0.253036	2.61971	0.00121685	3.372
pig_newGene_1345	0.435783	1.58291	0.00121685	1.86089
ENSSSCG00000009612	0.331479	1.83439	0.00121685	2.46831
ENSSSCG00000003684	2.92675	0.935177	0.00308287	-1.64599
ENSSSCG00000024043	2.4372	4.94157	0.00121685	1.01974
pig_newGene_1205	2.69153	8.38472	0.00806905	1.63934
ENSSSCG00000009904	34.408	160.903	0.00121685	2.22537
pig_newGene_837	51.0689	113.637	0.00986568	1.15392
ENSSSCG00000001971	31.6266	14.352	0.00308287	-1.13988
ENSSSCG00000012698	8.4543	3.72385	0.00121685	-1.18289
ENSSSCG00000004458	0.75655	2.17425	0.00926216	1.52301
ENSSSCG00000026759	8.94455	22.8067	0.00121685	1.35037
ENSSSCG00000016737	173.113	415.593	0.00121685	1.26346
ENSSSCG00000027230	2.07992	0.737535	0.00121685	-1.49574
ENSSSCG00000023105	6.87769	14.3299	0.00467898	1.05904
pig_newGene_2518	140.934	57.9152	0.00390909	-1.283
ENSSSCG00000006172	0.949188	2.60977	0.00121685	1.45916
ENSSSCG00000002829	37.3053	81.1845	0.00221278	1.12182
ENSSSCG00000012076	1.2972	6.35303	0.00121685	2.29205
ENSSSCG00000029889	123.849	271.447	0.00221278	1.13209
ENSSSCG00000007265	92.1386	208.847	0.00121685	1.18057
ENSSSCG00000021588	11.3798	2.07631	0.00121685	-2.45438
ENSSSCG00000022289	3.3972	7.69741	0.00121685	1.18003
ENSSSCG00000010104	22.1115	59.9315	0.00121685	1.43852
ENSSSCG00000011592	3.45699	9.13564	0.00121685	1.40199
ENSSSCG00000013237	5.59326	15.4065	0.00121685	1.46178
ENSSSCG00000022320	0.767142	2.29837	0.00121685	1.58304
ENSSSCG00000023085	1.68067	6.74442	0.00121685	2.00466
ENSSSCG00000006590	0	0.944136	0.00121685	inf
ENSSSCG00000026931	26.264	72.1878	0.00121685	1.45867
ENSSSCG00000005842	15.2595	31.472	0.00390909	1.04436
ENSSSCG00000012967	2.33854	16.3052	0.00121685	2.80166
ENSSSCG00000002559	1.79864	6.35951	0.00926216	1.82201
ENSSSCG00000003795	2.09467	4.69775	0.00121685	1.16525
ENSSSCG00000013883	5.36841	11.1159	0.00121685	1.05006
ENSSSCG00000011646	10.438	43.2645	0.00121685	2.05134
pig_newGene_2507	2.01372	0.249231	0.00121685	-3.01431
ENSSSCG00000026422	0.800375	2.32159	0.00541722	1.53637
ENSSSCG00000012437	1.36014	0.605353	0.00308287	-1.16791
ENSSSCG00000006717	0.64665	4.55124	0.00121685	2.8152
ENSSSCG00000013114	1.49413	4.22388	0.00121685	1.49926
ENSSSCG00000010494	73.3837	16.0719	0.00121685	-2.19092
ENSSSCG00000014916	2.83427	24.2633	0.00390909	3.09773
ENSSSCG00000014725	179.617	568.878	0.00121685	1.66319
ENSSSCG00000016986	4.2416	2.00586	0.00308287	-1.08039
ENSSSCG00000001641	14.227	6.33603	0.00679118	-1.16698
pig_newGene_3754	7777	18122.1	0.00221278	1.22046
ENSSSCG00000009178	14.0978	29.7304	0.00308287	1.07647
ENSSSCG00000017066	7.22093	3.13312	0.00121685	-1.20459
ENSSSCG00000022689	8.01923	16.4684	0.00986568	1.03817
ENSSSCG00000025514	21.1146	6.50676	0.00121685	-1.69823
ENSSSCG00000030113	15.0028	56.5432	0.00121685	1.91412
ENSSSCG00000008038	29.546	59.6658	0.00121685	1.01394
ENSSSCG00000029189	0.95896	2.72643	0.00121685	1.50747
ENSSSCG00000010966	2.45708	8.56486	0.00390909	1.80149
ENSSSCG00000014255	32.4751	11.1725	0.00121685	-1.53938
ENSSSCG00000012960	29.6362	13.5992	0.00866872	-1.12384
ENSSSCG00000000292	13.4611	36.8588	0.00121685	1.45321
ENSSSCG00000009152	0.847006	3.81154	0.00121685	2.16993
pig_newGene_2089	4.71695	12.9649	0.00121685	1.45869
ENSSSCG00000015475	32.9605	99.4666	0.00121685	1.59347
ENSSSCG00000006940	20.6678	79.4904	0.00121685	1.9434
ENSSSCG00000030921	15.297	36.3545	0.00121685	1.24889
ENSSSCG00000008966	2.08933	6.09817	0.00121685	1.54534
ENSSSCG00000030984	11.6892	31.2085	0.00121685	1.41676
ENSSSCG00000023046	3.74967	1.71272	0.00611378	-1.13047
ENSSSCG00000029074	180.756	765.876	0.00121685	2.08307
ENSSSCG00000001453	53.1195	108.004	0.00221278	1.02376
ENSSSCG00000000981	2.80662	7.83934	0.00121685	1.4819
ENSSSCG00000005981	53.302	7.69926	0.00121685	-2.7914
ENSSSCG00000013046	38.0908	78.9152	0.00308287	1.05086
ENSSSCG00000006512	13.5264	27.4883	0.00221278	1.02304
ENSSSCG00000030326	5.21264	2.53971	0.00390909	-1.03735
ENSSSCG00000028846	9.80943	20.7682	0.00926216	1.08213
ENSSSCG00000001912	3.38426	7.87842	0.00121685	1.21907
ENSSSCG00000030182	5.0874	12.8319	0.00121685	1.33473
ENSSSCG00000007043	13.053	4.82729	0.00121685	-1.4351
ENSSSCG00000008096	5.54216	2.20695	0.00467898	-1.3284
ENSSSCG00000008128	0.732389	4.25153	0.00121685	2.5373
ENSSSCG00000026110	6.45244	14.7387	0.00467898	1.1917
ENSSSCG00000029715	2.59486	7.14355	0.00121685	1.46098
ENSSSCG00000009914	23.5097	50.706	0.00308287	1.1089
ENSSSCG00000017238	2.49131	5.73684	0.00121685	1.20335
ENSSSCG00000018055	41.7922	88.818	0.00121685	1.08762
ENSSSCG00000016432	18.1606	5.89113	0.00121685	-1.62419
ENSSSCG00000000180	4.92609	14.1721	0.00742881	1.52454
pig_newGene_1593	8.2148	30.8748	0.00121685	1.91013
pig_newGene_1424	46.7065	18.7985	0.00121685	-1.31301
ENSSSCG00000017878	144.104	70.2624	0.00467898	-1.03628
ENSSSCG00000016502	0.412455	1.48895	0.00221278	1.85199
ENSSSCG00000010495	2.13446	5.01647	0.00121685	1.2328
ENSSSCG00000027093	3.89583	1.4188	0.00121685	-1.45726
ENSSSCG00000012077	2.17201	23.8978	0.00121685	3.45978
ENSSSCG00000029691	1.08753	3.27342	0.00541722	1.58975
ENSSSCG00000029144	1.65693	6.6597	0.00390909	2.00694
ENSSSCG00000002281	26.2233	11.4706	0.00121685	-1.19292
ENSSSCG00000010728	2.24888	4.8145	0.00221278	1.09818
ENSSSCG00000026551	8.56953	19.783	0.00308287	1.20697
ENSSSCG00000011397	19.0529	5.58778	0.00121685	-1.76966
ENSSSCG00000015326	73.9547	193.837	0.00308287	1.39013
ENSSSCG00000025876	6.25771	2.84753	0.00467898	-1.13593
ENSSSCG00000022600	65.897	133.721	0.00611378	1.02094
ENSSSCG00000011361	9.35835	4.54016	0.00390909	-1.04351
ENSSSCG00000029949	5.15761	13.3241	0.00121685	1.36927
ENSSSCG00000008648	1.68942	10.4032	0.00121685	2.62242
pig_newGene_2770	11.3654	5.53131	0.00611378	-1.03895
ENSSSCG00000003167	2.27321	5.7747	0.00986568	1.34502
ENSSSCG00000016396	0.947622	6.11478	0.00121685	2.68992
ENSSSCG00000017255	4.9577	1.51921	0.00121685	-1.70635
ENSSSCG00000004143	98.2225	44.6202	0.00308287	-1.13836
ENSSSCG00000027607	2.38398	23.6014	0.00121685	3.30743
ENSSSCG00000021220	3.51602	9.26292	0.00541722	1.39752
ENSSSCG00000004634	9.36578	3.49832	0.00121685	-1.42074
ENSSSCG00000013408	4.5467	20.7986	0.00121685	2.1936
ENSSSCG00000024300	0.862768	2.26948	0.00986568	1.39531
ENSSSCG00000013436	365.556	812.556	0.00121685	1.15237
ENSSSCG00000015659	0.319422	1.2174	0.00221278	1.93026
ENSSSCG00000003648	23.7564	11.8276	0.00121685	-1.00615
pig_newGene_681	3.93585	9.95266	0.00121685	1.33841
ENSSSCG00000023133	2.72902	0.952833	0.00221278	-1.51809
ENSSSCG00000009833	2.76578	6.18039	0.00121685	1.16001
ENSSSCG00000022212	4.56904	2.2659	0.00742881	-1.01181
pig_newGene_444	9.97753	3.4751	0.00611378	-1.52163
ENSSSCG00000009642	0.515653	1.85009	0.00121685	1.84312
ENSSSCG00000015110	5.73781	24.4964	0.00806905	2.09399
ENSSSCG00000014132	4.30313	1.27463	0.00679118	-1.75531
ENSSSCG00000004139	1.16029	3.31014	0.00121685	1.51241
ENSSSCG00000017083	154.94	351.725	0.00121685	1.18274
ENSSSCG00000003467	37.7092	12.127	0.00121685	-1.6367
ENSSSCG00000014560	1519.37	4631.92	0.00121685	1.60814
ENSSSCG00000011194	5.77316	2.74032	0.00121685	-1.07502
ENSSSCG00000030296	7.87525	3.81057	0.00221278	-1.04732
ENSSSCG00000004617	12.1721	5.86375	0.00121685	-1.05368
ENSSSCG00000017472	13.374	39.713	0.00121685	1.57019
ENSSSCG00000028833	2.31152	10.8896	0.00121685	2.23604
ENSSSCG00000002864	0.572485	1.79164	0.00742881	1.64597
ENSSSCG00000003261	230.44	582.965	0.00121685	1.33902
ENSSSCG00000024108	54.5343	21.6582	0.00121685	-1.33225
ENSSSCG00000022209	22.1167	52.7461	0.00121685	1.25393
ENSSSCG00000024458	4.46884	12.5502	0.00121685	1.48974
ENSSSCG00000022484	72.3365	160.531	0.00221278	1.15006
ENSSSCG00000027855	1.8356	5.90709	0.00221278	1.6862
ENSSSCG00000017268	7.72177	3.14291	0.00308287	-1.29683
ENSSSCG00000029171	0	7.00735	0.00121685	inf
ENSSSCG00000013377	4.13079	15.3329	0.00121685	1.89214
ENSSSCG00000015784	178.065	42.0009	0.00121685	-2.08391
ENSSSCG00000004754	0.73357	19.1545	0.00121685	4.7066
ENSSSCG00000001699	1.22722	5.55131	0.00121685	2.17743
ENSSSCG00000027269	1.83821	5.55984	0.00221278	1.59674
ENSSSCG00000027982	4.48535	65.2974	0.00121685	3.86373
ENSSSCG00000023031	8.55258	70.0169	0.00121685	3.03327
ENSSSCG00000005459	49.2223	24.4	0.00308287	-1.01243
ENSSSCG00000005431	1.71005	5.05259	0.00121685	1.56299
ENSSSCG00000017702	1.52194	4.81277	0.00926216	1.66095
ENSSSCG00000016983	1.03515	2.71005	0.00866872	1.38848
ENSSSCG00000003458	7.67969	18.0528	0.00121685	1.2331
ENSSSCG00000021906	0.710535	1.62525	0.00806905	1.19368
ENSSSCG00000008624	34.989	10.82	0.00121685	-1.6932
ENSSSCG00000006857	0.368172	1.25918	0.00121685	1.77403
ENSSSCG00000016606	576.763	207.024	0.00121685	-1.47818
ENSSSCG00000024279	1.59342	0	0.00121685	#NAME?
ENSSSCG00000017887	1.0049	6.53893	0.00121685	2.702
ENSSSCG00000000951	4.18524	21.5414	0.00121685	2.36373
ENSSSCG00000011765	61.2548	25.957	0.00121685	-1.2387
ENSSSCG00000028304	25.6668	62.5698	0.00121685	1.28556
ENSSSCG00000017723	4.10049	30.4827	0.00121685	2.89412
ENSSSCG00000023413	15.8752	3.38003	0.00121685	-2.23166
ENSSSCG00000027204	18.6982	47.7669	0.00121685	1.35312
ENSSSCG00000030143	14.4431	33.4885	0.00121685	1.21329
pig_newGene_4191	180.65	566.326	0.00121685	1.64843
ENSSSCG00000009077	0.2175	0.985211	0.00121685	2.17942
pig_newGene_4301	0.377433	2.42969	0.00390909	2.68648
ENSSSCG00000021624	2.61259	6.74881	0.00121685	1.36915
ENSSSCG00000013594	0.378301	1.42038	0.00221278	1.90867
ENSSSCG00000022301	106.379	241.77	0.00121685	1.18443
ENSSSCG00000014431	2.59504	6.32201	0.00308287	1.28463
ENSSSCG00000013573	44.9508	102.099	0.00121685	1.18355
ENSSSCG00000001900	3.65879	8.50217	0.00121685	1.21646
ENSSSCG00000010548	13.5292	5.62557	0.00121685	-1.26601
ENSSSCG00000024837	2.27277	5.31868	0.00390909	1.22662
ENSSSCG00000009937	14.0583	5.22665	0.00121685	-1.42746
ENSSSCG00000022111	53.7078	116.44	0.00121685	1.11638
ENSSSCG00000009793	70.2017	21.6455	0.00121685	-1.69744
ENSSSCG00000006740	12.8455	26.9184	0.00121685	1.06733
ENSSSCG00000017616	1.13878	4.46342	0.00467898	1.97066
ENSSSCG00000016929	30.9173	14.1915	0.00308287	-1.12338
ENSSSCG00000006395	21.4629	66.6844	0.00121685	1.6355
ENSSSCG00000002476	0.159622	1.70986	0.00986568	3.42114
ENSSSCG00000003115	1.58732	4.76252	0.00121685	1.58513
ENSSSCG00000028022	58.4542	134.256	0.00121685	1.19961
ENSSSCG00000003722	38.0837	3.01091	0.00121685	-3.6609
ENSSSCG00000010276	0.829522	2.09146	0.00121685	1.33416
ENSSSCG00000027519	43.273	19.4513	0.00121685	-1.1536
ENSSSCG00000015883	14.098	6.71746	0.00221278	-1.06951
ENSSSCG00000025795	0.28626	1.27314	0.00121685	2.15299
ENSSSCG00000002383	61.8685	341.879	0.00121685	2.46621
ENSSSCG00000021399	6.11071	26.5284	0.00121685	2.11813
ENSSSCG00000000975	1.17758	0.310503	0.00390909	-1.92315
ENSSSCG00000010166	11.0088	36.0749	0.00121685	1.71234
ENSSSCG00000008540	225.364	110.1	0.00121685	-1.03344
ENSSSCG00000009240	0.483406	4.97207	0.00308287	3.36254
pig_newGene_101	0.628309	4.08085	0.00121685	2.69932
ENSSSCG00000014871	4.18872	9.79762	0.00221278	1.22592
ENSSSCG00000007585	124.785	315.428	0.00121685	1.33787
ENSSSCG00000029944	12.4083	43.0204	0.00121685	1.79372
ENSSSCG00000007546	9.18614	23.269	0.00121685	1.34088
ENSSSCG00000009871	1.67874	4.90517	0.00121685	1.54692
ENSSSCG00000016451	2.07095	6.62456	0.00121685	1.67753
ENSSSCG00000009926	2.1046	6.78112	0.00121685	1.68798
ENSSSCG00000016530	68.4135	14.0658	0.00121685	-2.28209

## Sheet: 240d vs 400d
Ensemble gene ID	FPKM(240d)	FPKM(400d)	FDR	log2(fold change)
ENSSSCG00000010429	17.0856	3.43293	0.00121685	-2.31527
ENSSSCG00000024144	579.5	287.315	0.00121685	-1.01217
ENSSSCG00000014362	91.3155	40.6889	0.00679118	-1.16623
ENSSSCG00000013144	1.36831	4.18277	0.00121685	1.61206
ENSSSCG00000009338	14.6455	4.93059	0.00121685	-1.57062
ENSSSCG00000024163	1.31351	3.7109	0.00742881	1.49835
ENSSSCG00000017983	23.9303	60.0463	0.00121685	1.32723
ENSSSCG00000012160	2.09536	4.60901	0.00611378	1.13726
ENSSSCG00000004415	6.27548	2.78138	0.00541722	-1.17392
pig_newGene_1673	50.65	18.7316	0.00121685	-1.43509
ENSSSCG00000014934	14.7941	6.32054	0.00121685	-1.2269
ENSSSCG00000004665	0	1.34376	0.00121685	inf
ENSSSCG00000023489	1.90992	9.1959	0.00121685	2.26748
ENSSSCG00000016448	1.94975	5.77059	0.00121685	1.56543
ENSSSCG00000005935	6.21482	2.74587	0.00541722	-1.17845
ENSSSCG00000026968	27.8242	8.53288	0.00866872	-1.70523
ENSSSCG00000004065	3.86206	1.43771	0.00467898	-1.4256
ENSSSCG00000010554	34.2786	14.297	0.00221278	-1.26159
ENSSSCG00000015092	1.11579	3.67367	0.00611378	1.71915
ENSSSCG00000015268	22.2426	9.41855	0.00121685	-1.23975
ENSSSCG00000024888	15.4993	6.22306	0.00121685	-1.31651
ENSSSCG00000003766	224.73	93.7977	0.00121685	-1.26057
ENSSSCG00000027426	17.0867	35.7675	0.00866872	1.06578
ENSSSCG00000028552	1.19285	3.28557	0.00221278	1.46173
ENSSSCG00000017416	3.37598	1.32424	0.00121685	-1.35015
ENSSSCG00000010300	30.3335	67.4936	0.00121685	1.15384
ENSSSCG00000006919	3.38865	24.2528	0.00121685	2.83937
ENSSSCG00000024982	10.0481	21.827	0.00121685	1.11919
ENSSSCG00000002252	5.34621	25.3424	0.00121685	2.24496
ENSSSCG00000026474	2.39371	0.585797	0.00121685	-2.03077
ENSSSCG00000017607	5.48595	21.1963	0.00121685	1.95
ENSSSCG00000011451	1.23178	0.27791	0.00308287	-2.14806
ENSSSCG00000006312	9.02702	4.02053	0.00926216	-1.16686
ENSSSCG00000010201	1.06436	0.352628	0.00806905	-1.59377
ENSSSCG00000007874	8.21859	3.96527	0.00221278	-1.05147
ENSSSCG00000004490	0.59783	1.26436	0.00806905	1.0806
ENSSSCG00000023298	16.7039	3.9504	0.00121685	-2.08012
ENSSSCG00000011538	377.282	142.608	0.00121685	-1.40359
ENSSSCG00000027480	1.15103	7.69895	0.00121685	2.74173
ENSSSCG00000014336	111.047	43.267	0.00121685	-1.35983
ENSSSCG00000025127	17.5812	8.06583	0.00611378	-1.12414
ENSSSCG00000029931	1.06448	0	0.00541722	#NAME?
ENSSSCG00000001906	2.43466	0.670147	0.00121685	-1.86117
ENSSSCG00000029507	3.41053	8.71453	0.00121685	1.35343
ENSSSCG00000027130	450.906	160.664	0.00679118	-1.48878
ENSSSCG00000025106	3.11057	7.1052	0.00679118	1.19169
ENSSSCG00000001759	128.97	31.5085	0.00121685	-2.03322
ENSSSCG00000010686	481.365	151.936	0.00121685	-1.66366
ENSSSCG00000013599	9.41031	23.2528	0.00611378	1.30509
ENSSSCG00000015850	3.94253	1.1975	0.00121685	-1.7191
ENSSSCG00000002279	26.2222	7.15639	0.00121685	-1.87348
ENSSSCG00000023630	4.7113	1.37723	0.00679118	-1.77436
ENSSSCG00000004125	1.725	5.52531	0.00121685	1.67946
ENSSSCG00000017759	18.96	8.90144	0.00541722	-1.09085
ENSSSCG00000013303	1.98099	0.65868	0.00121685	-1.58857
pig_newGene_558	12.8737	1.62488	0.00308287	-2.98603
ENSSSCG00000017376	2.74335	6.8285	0.00679118	1.31563
pig_newGene_3940	115.429	39.7231	0.00121685	-1.53896
ENSSSCG00000017421	11.2105	5.42902	0.00866872	-1.04609
ENSSSCG00000010522	178.755	53.0471	0.00121685	-1.75264
pig_newGene_3860	390.775	182.618	0.00806905	-1.09751
ENSSSCG00000012631	13.1705	4.30364	0.00121685	-1.61369
ENSSSCG00000001573	6.52278	16.7491	0.00121685	1.36053
ENSSSCG00000030616	3.14622	1.48495	0.00541722	-1.0832
ENSSSCG00000026597	4.47559	1.14139	0.00121685	-1.97129
ENSSSCG00000011133	10.5932	68.3223	0.00121685	2.68922
pig_newGene_3289	338.885	70.8972	0.00121685	-2.257
ENSSSCG00000025632	16.736	3.44186	0.00926216	-2.28169
pig_newGene_435	1.29027	0	0.00121685	#NAME?
ENSSSCG00000028420	32.0179	12.0948	0.00121685	-1.40449
ENSSSCG00000014921	69.0403	31.4558	0.00121685	-1.13411
ENSSSCG00000010312	19.9995	76.5173	0.00121685	1.93582
ENSSSCG00000016288	7.45194	1.56205	0.00121685	-2.25417
ENSSSCG00000011534	42.3764	119.269	0.00121685	1.49289
ENSSSCG00000026755	6.32038	12.933	0.00742881	1.03298
ENSSSCG00000009432	9.59575	4.71842	0.00679118	-1.02409
ENSSSCG00000015436	6.13193	1.60656	0.00121685	-1.93236
ENSSSCG00000001549	27.0599	7.07465	0.00221278	-1.93542
ENSSSCG00000003479	16.4619	6.90121	0.00121685	-1.25421
pig_newGene_4274	54.5689	25.1343	0.00121685	-1.11842
ENSSSCG00000014216	1.00672	3.30874	0.00121685	1.71661
ENSSSCG00000001469	11.233	24.0664	0.00541722	1.09928
ENSSSCG00000029558	8.73403	3.1312	0.00121685	-1.47993
ENSSSCG00000008261	4.14497	9.33137	0.00121685	1.17073
ENSSSCG00000028736	83.8254	14.4912	0.00121685	-2.53221
ENSSSCG00000003006	0.943447	5.66852	0.00121685	2.58696
ENSSSCG00000030395	279.271	88.621	0.00121685	-1.65595
ENSSSCG00000007978	662.865	136.321	0.00121685	-2.28171
ENSSSCG00000016047	2.61148	10.3264	0.00121685	1.98339
ENSSSCG00000015834	12.4176	29.1263	0.00121685	1.22994
ENSSSCG00000021206	1.20323	0.424353	0.00541722	-1.50357
ENSSSCG00000012950	1.03635	0.288426	0.00866872	-1.84524
ENSSSCG00000028326	222.907	516.757	0.00121685	1.21304
pig_newGene_3036	25.6017	3.8726	0.00121685	-2.72487
ENSSSCG00000020903	118.236	44.8621	0.00121685	-1.39809
ENSSSCG00000004357	1.96477	0.67542	0.00221278	-1.54051
ENSSSCG00000002274	3.51086	7.44791	0.00121685	1.08501
ENSSSCG00000029023	16.6565	5.53521	0.00121685	-1.58937
ENSSSCG00000022953	3.58568	9.46054	0.00121685	1.39968
ENSSSCG00000006352	44.0849	21.0349	0.00679118	-1.0675
ENSSSCG00000013784	197.688	74.6226	0.00742881	-1.40554
pig_newGene_2764	4.64011	10.9094	0.00121685	1.23335
ENSSSCG00000027341	3.43569	1.26562	0.00121685	-1.44076
ENSSSCG00000011980	35.818	17.0641	0.00221278	-1.06972
ENSSSCG00000017987	5.42772	1.66668	0.00121685	-1.70337
ENSSSCG00000015798	8.37451	2.17545	0.00121685	-1.94469
ENSSSCG00000014838	3.74766	11.7839	0.00121685	1.65275
ENSSSCG00000002258	2.76994	5.87602	0.00221278	1.08499
ENSSSCG00000016452	0.709179	2.0234	0.00926216	1.51256
ENSSSCG00000016991	247.667	86.5295	0.00121685	-1.51714
ENSSSCG00000029371	2.82127	6.76448	0.00121685	1.26164
ENSSSCG00000026816	1.14619	0.284375	0.00221278	-2.01098
ENSSSCG00000016475	3.11825	7.17341	0.00926216	1.20192
ENSSSCG00000015085	1.35459	3.91947	0.00121685	1.5328
ENSSSCG00000015986	4.3177	1.90529	0.00926216	-1.18025
ENSSSCG00000006655	3.24764	18.2756	0.00121685	2.49246
ENSSSCG00000009462	34.2584	5.46431	0.00121685	-2.64835
ENSSSCG00000011478	4.47928	1.61304	0.00121685	-1.47348
ENSSSCG00000030927	0	1.49805	0.00467898	inf
ENSSSCG00000005762	2.06663	4.72015	0.00308287	1.19156
ENSSSCG00000009717	6.67447	3.1914	0.00611378	-1.06446
pig_newGene_61	2.42053	1.03352	0.00308287	-1.22776
ENSSSCG00000003490	18.2956	8.94429	0.00611378	-1.03246
ENSSSCG00000016062	10.0602	2.98963	0.00121685	-1.75063
ENSSSCG00000012941	11.7709	3.71175	0.00121685	-1.66505
ENSSSCG00000007115	8.20627	16.458	0.00467898	1.00399
ENSSSCG00000010908	1.89602	4.56387	0.00308287	1.26728
ENSSSCG00000002471	134.251	66.5929	0.00541722	-1.01149
ENSSSCG00000010850	139.56	21.8316	0.00121685	-2.6764
ENSSSCG00000011848	70.4552	15.9369	0.00121685	-2.14433
ENSSSCG00000011000	292.018	92.2265	0.00121685	-1.66281
ENSSSCG00000012035	0.7067	1.54776	0.00679118	1.13101
ENSSSCG00000026182	33.6047	7.1547	0.00121685	-2.2317
ENSSSCG00000030801	1.59672	5.00184	0.00121685	1.64734
ENSSSCG00000027332	0	3.74482	0.00121685	inf
ENSSSCG00000001835	8.52437	1.68334	0.00121685	-2.34027
ENSSSCG00000009412	3.74188	8.49716	0.00221278	1.18322
ENSSSCG00000027060	3.12676	1.38164	0.00926216	-1.17829
ENSSSCG00000008629	31.332	9.24693	0.00121685	-1.76059
ENSSSCG00000004142	53.2287	17.9944	0.00121685	-1.56465
ENSSSCG00000010461	1473.86	302.437	0.00121685	-2.28489
ENSSSCG00000010814	3.48239	0.859338	0.00121685	-2.01878
ENSSSCG00000007440	2.32244	6.47823	0.00541722	1.47996
ENSSSCG00000004392	42.4249	18.0329	0.00221278	-1.23428
ENSSSCG00000014834	23.3342	10.3087	0.00121685	-1.17858
ENSSSCG00000004039	1.0778	0.271897	0.00308287	-1.98696
ENSSSCG00000011195	2.77844	0.339625	0.00121685	-3.03226
ENSSSCG00000024385	5.23157	11.3992	0.00390909	1.12361
ENSSSCG00000017311	9.44594	19.531	0.00221278	1.048
ENSSSCG00000012126	7.52705	3.38336	0.00308287	-1.15363
ENSSSCG00000011106	24.312	82.2069	0.00121685	1.75759
ENSSSCG00000027826	5.57165	14.459	0.00121685	1.3758
ENSSSCG00000026196	8.00752	2.06627	0.00121685	-1.95433
ENSSSCG00000012792	1.54591	4.78992	0.00221278	1.63154
ENSSSCG00000001081	7.7518	2.81361	0.00121685	-1.46211
ENSSSCG00000009856	0.698949	2.35521	0.00121685	1.75259
ENSSSCG00000029772	13.0284	53.8389	0.00121685	2.04699
ENSSSCG00000023044	85.8149	34.8664	0.00121685	-1.29939
ENSSSCG00000024312	3.95386	1.60485	0.00121685	-1.30082
pig_newGene_1044	0.946609	0	0.00121685	#NAME?
ENSSSCG00000014128	992.198	475.308	0.00221278	-1.06177
ENSSSCG00000011297	8.17217	3.37547	0.00121685	-1.27563
ENSSSCG00000025409	89.2465	34.492	0.00541722	-1.37153
ENSSSCG00000009040	17.9293	6.43514	0.00121685	-1.47827
ENSSSCG00000008162	7.24753	3.49424	0.00866872	-1.05251
ENSSSCG00000004238	22.5746	5.65994	0.00121685	-1.99584
ENSSSCG00000015334	96.2721	21.4747	0.00121685	-2.16448
ENSSSCG00000009334	145.338	47.2081	0.00121685	-1.6223
ENSSSCG00000008959	15.4576	6.76447	0.00866872	-1.19226
ENSSSCG00000029275	8.49446	1.52384	0.00121685	-2.47881
ENSSSCG00000017307	1.02758	8.126	0.00121685	2.9833
ENSSSCG00000023837	9.46494	2.68421	0.00221278	-1.81809
ENSSSCG00000021429	4.86494	1.82578	0.00121685	-1.41391
ENSSSCG00000014875	1.02239	2.20615	0.00679118	1.10958
ENSSSCG00000006053	33.9881	4.83748	0.00308287	-2.8127
ENSSSCG00000011853	2.33283	1.04558	0.00308287	-1.15778
pig_newGene_4254	12.5952	1.9053	0.00121685	-2.72479
ENSSSCG00000012347	5.38743	1.14946	0.00121685	-2.22864
ENSSSCG00000016827	11.9018	5.37749	0.00308287	-1.14618
pig_newGene_851	25.5786	10.2322	0.00121685	-1.32182
ENSSSCG00000005385	14.9808	63.4358	0.00121685	2.08219
ENSSSCG00000011727	26.1463	3.97387	0.00121685	-2.71799
ENSSSCG00000003155	118.659	43.721	0.00121685	-1.44042
ENSSSCG00000015144	0.377007	0.897947	0.00926216	1.25204
pig_newGene_561	28.0101	11.0903	0.00308287	-1.33666
pig_newGene_3053	11.2776	5.40191	0.00121685	-1.06191
ENSSSCG00000003081	8.74274	2.84244	0.00866872	-1.62095
ENSSSCG00000013400	37.185	12.0723	0.00121685	-1.62302
ENSSSCG00000029171	7.00735	0	0.00121685	#NAME?
ENSSSCG00000004754	19.1545	2.12455	0.00121685	-3.17245
ENSSSCG00000024300	2.26948	0.568424	0.00121685	-1.99732
pig_newGene_2769	12.8808	3.91429	0.00467898	-1.7184
pig_newGene_549	4.63965	0.585226	0.00742881	-2.98695
ENSSSCG00000004139	3.31014	0.440282	0.00121685	-2.91039
pig_newGene_99	10.5087	3.17833	0.00611378	-1.72525
ENSSSCG00000028137	12.1912	43.7198	0.00121685	1.84245
ENSSSCG00000012051	8.6093	2.26125	0.00121685	-1.92878
ENSSSCG00000029144	6.6597	0.645959	0.00390909	-3.36594
ENSSSCG00000002281	11.4706	3.66446	0.00121685	-1.64626
ENSSSCG00000000975	0.310503	1.08787	0.00541722	1.80883
ENSSSCG00000021399	26.5284	9.91804	0.00221278	-1.41941
ENSSSCG00000029944	43.0204	12.747	0.00121685	-1.75487
ENSSSCG00000009871	4.90517	0.665473	0.00121685	-2.88185
ENSSSCG00000009926	6.78112	3.15594	0.00308287	-1.10346
ENSSSCG00000028760	31.0586	5.49817	0.00121685	-2.49797
ENSSSCG00000025795	1.27314	0.368842	0.00221278	-1.78731
ENSSSCG00000021624	6.74881	2.8778	0.00308287	-1.22967
ENSSSCG00000024344	0.616496	2.16608	0.00121685	1.81292
ENSSSCG00000013393	2.64638	1.09595	0.00121685	-1.27184
ENSSSCG00000017702	4.81277	1.10678	0.00541722	-2.1205
ENSSSCG00000008624	10.82	5.33312	0.00541722	-1.02065
ENSSSCG00000021906	1.62525	0.706482	0.00467898	-1.20194
ENSSSCG00000021006	0.541409	4.4876	0.00121685	3.05116
ENSSSCG00000004479	18.6135	7.24419	0.00121685	-1.36145
ENSSSCG00000000455	1.26118	0.458356	0.00806905	-1.46024
ENSSSCG00000011325	2872.13	1180.97	0.00221278	-1.28215
ENSSSCG00000029668	0.423476	1.55586	0.00121685	1.87737
ENSSSCG00000021569	2.61971	0.213205	0.00121685	-3.61909
ENSSSCG00000030544	20.6813	8.73189	0.00121685	-1.24396
ENSSSCG00000000002	1.06189	0.296484	0.00308287	-1.84061
ENSSSCG00000015647	0.726873	1.9349	0.00390909	1.41248
ENSSSCG00000009886	46.1904	7.38506	0.00121685	-2.64491
ENSSSCG00000021944	1.65214	3.94992	0.00308287	1.25749
ENSSSCG00000017142	14.5456	6.70378	0.00221278	-1.11754
ENSSSCG00000005636	28.887	72.2858	0.00121685	1.32329
ENSSSCG00000015048	1.40753	0.277993	0.00308287	-2.34004
pig_newGene_2739	128.075	12.8581	0.00121685	-3.31624
ENSSSCG00000028695	5.91116	76.1256	0.00121685	3.68687
ENSSSCG00000006924	5.92079	34.3649	0.00121685	2.53707
ENSSSCG00000010330	9.42356	4.11277	0.00308287	-1.19616
ENSSSCG00000026110	14.7387	2.22728	0.00121685	-2.72626
ENSSSCG00000004233	2.81108	0.779281	0.00390909	-1.85091
ENSSSCG00000000130	1.02471	2.53733	0.00121685	1.3081
ENSSSCG00000010220	1.26734	0.0687039	0.00121685	-4.20527
ENSSSCG00000022003	23.5595	0.577799	0.00121685	-5.3496
pig_newGene_2496	0	1.07878	0.00121685	inf
ENSSSCG00000015475	99.4666	44.0283	0.00121685	-1.17578
ENSSSCG00000008991	4.91986	43.0099	0.00121685	3.12798
ENSSSCG00000009437	2.75918	8.63821	0.00121685	1.64649
ENSSSCG00000014277	7.37424	32.4817	0.00121685	2.13906
ENSSSCG00000006717	4.55124	1.51314	0.00121685	-1.58871
ENSSSCG00000014916	24.2633	6.21865	0.00390909	-1.9641
ENSSSCG00000014725	568.878	126.745	0.00121685	-2.16619
pig_newGene_50	8.7392	2.87383	0.00679118	-1.60453
ENSSSCG00000009216	2.36256	16.957	0.00121685	2.84345
ENSSSCG00000025729	16.2933	40.9563	0.00121685	1.32981
ENSSSCG00000010044	12.6901	261.729	0.00121685	4.36629
pig_newGene_884	2.77189	0.445817	0.00121685	-2.63635
ENSSSCG00000030385	7.21073	15.4519	0.00121685	1.09956
ENSSSCG00000012967	16.3052	3.68735	0.00221278	-2.14468
ENSSSCG00000003795	4.69775	2.32857	0.00308287	-1.01253
